# Supplementary material for: Assessment of three equations to calculate plasma LDL cholesterol concentration in fasting and non-fasting hypertriglyceridemic patients
Source: publisher site journal article supplement (doi:10.1515/cclm-2023-0360), 2023-09-07
Supplement: Supplementary file 1 [file j_cclm-2023-0360_suppl_002.docx]

**Assessment of three equations to accurately calculate plasma LDL cholesterol concentration in fasting and non-fasting subjects**

**Supplemental data:**

**Summary of the literature review** Supplement Table 1.

**Flow Chart**

Supplemental Figure 1. Flow charts of the study population

**Supplemental Material**

**Patients with fasting samples**

Supplemental Figure 2. Correlation Calculated vs Ultracentrifugation Low-Density Lipoprotein Cholesterol (LDL-C) levels on fasting population (n = 5826)

Supplemental Figure 3. Correlation Calculated vs Ultracentrifugation Low-Density Lipoprotein Cholesterol (LDL-C) levels on fasting population focus on TG ≤ 9.04 mmol/L (n = 5241)

Supplemental Figure 4. Residual Error Plots for Low-Density Lipoprotein Cholesterol by TG concentration on fasting population (n=5826)

Supplemental Figure 5. Residual Error Plots for Low-Density Lipoprotein Cholesterol by Non-HDL-C levels on fasting population (n=5826)

Supplemental Figure 6. MAD score for TG intervals on fasting population (TG ≤ 9.04 mmol/L) (n=5241)

Supplemental Table 2. Difference between the median of uLDL-C and cLDL-C on fasting population (n=5826)

Supplemental Table 3. Misclassification table for TG ≤ 4.52mmol/L on fasting population

Supplemental Table 4. Classification table for cLDL-c<1.80mmol/L and TG<4.52 mmol/L on fasting population

**Patients in non-fasting state**

Supplemental Figure 7. Correlation ultra-LDL-C vs calculated LDL-C on non-fasting population (n=1180)

Supplemental Figure 8. Correlation ultra-LDL-C vs calculated LDL-C for TG ≤ 9.04 mmol/L in postprandial state (n = 1107)

Supplemental Figure 9. Residual Error Plots for Low-Density Lipoprotein Cholesterol for TG ≤ 9.04 mmol/L in postprandial state (n=1107)

Supplemental Figure 10. Residual Error Plots for Low-Density Lipoprotein Cholesterol by Non-HDL-C levels on non-fasting population (n=1180)

Supplemental Figure 11. MAD score for TG intervals in postprandial state (n=1107)

Supplement Table 5. Misclassification in non-fasting population (n=1180)

Supplement Table 6. Classification table for cLDL-c<1.80mmol/L and TG<4.52 mmol/L on non-fasting population

Supplement Table 1. Summary of the literature review articles published between 2020 and 2023 and initial publications)

| **Source** | **Equations studied** | **Standard method** | **Cohort** | **Exclusion criteria** | **Preferred equation** |
| --- | --- | --- | --- | --- | --- |
| **Comparison with independant LDLc measurement (direct, VAP, UCF, BQ)** | | | | | |
| In favour of Martin-Hopkins (before Sampson equation publication) | | | | | |
| Martin et al, (2013) [1] | Friedewald, Martin-Hopkins | **Vertical Auto Profile VAP** | 1350 908 samples | NC | Martin-Hopkins |
| Martin et al, (2018) [2] | Friedewald, Martin-Hopkins | **Ultracentrifugation** | 27 564 patients CVD treated by Evolocumab or placebo | NC | Martin-Hopkins |
| Sathiyakumar et al, (2018) [3] | Friedewald, Martin-Hopkins | **VAP (accuracy reviewed yearly by random splite-sample comparison with beta quantification)** | 1 545 634 samples (959 153 fasting, 586 481 non-fasting) | Incomplete lipid profile or medical file | Martin-Hopkins |
| In favour of Martin-Hopkins since 2020 | | | | | |
| Song et al, (2021) [4] | Friedewald, Martin-Hopkins, Sampson | 3 different direct LDL-C assays | 177 111 samples including 44.2% dyslipidemic | Incomplete lipid profile | Martin-Hopkins |
| Rossouw et al, (2021) [5] | Friedewald, Martin-Hopkins, Martin-Hopkins extended, Sampson and 7 others | 2 direct LDL-C assays | N=9995 (Architect)  N=4782 (Roche) | Samples with haemolysis and icterus | Martin-Hopkins can be safely implemented whereas caution is advised regarding the Sampson equation |
| Azimi et al, (2022) [6] | Friedewald, Martin-Hopkins, Sampson | Direct LDL-C assay | 934 samples | Results outside the 1st and 99th percentiles | Martin-Hopkins |
| Martin et al, (2023) [7] | Friedewald, Martin-Hopkins, Sampson | **Beta quantification** | 242 fasting samples double-blind treatment with statin, CETP inhibitor or placebo (921 observations) | - Clinical manifestations of CVD,  - Uncontrolled diabetes,  - Uncontrolled hypertension,  - History of hyperaldosteronism, muscular disease or hyper-creatinemia, metabolic dysfunction. | Martin-Hopkins |
| Barakett-Hamadé et al, (2023) [8] | Friedewald, Sampson, Martin-Hopkins | Direct LDL-C assay | 4008 fasting samples with mild hypertriglyceridemia and low LDL-C | Incomplete lipid profile or LDL>2.58mmol/L and TG<1.69 or > 3.9mmol/L | Martin-Hopkins |
| Steyn et al, (2022) [9] | Friedewald, Martin-Hopkins, extended Martin-Hopkins Sampson, Hattori, Anandaraja | Direct LDL-C assay | 7 598 paediatric cohort and 57 165 adult cohort with uncontrolled diabetes | NC | Martin-Hopkins |
| Samuel et al, (2023) [10] | Friedewald, Martin-Hopkins, Sampson and 20 others | VAP | 5 051 467 lipid profiles | Incomplete lipid profile | Martin-Hopkins |
| In favour of Martin-Hopkins extended | | | | | |
| Sajja et al, (2021) [11] | Friedewald, Martin-Hopkins extended, Sampson | **VAP** | 11 939 patients with 4.50<TG<9.02mmol/L (derivation and validation dataset) | TG <4.5 or >9.0 mmol/L | Martin-Hopkins extended |
| Zararsız et al, (2022) [12] | Friedewald, Martin-Hopkins, Martin-Hopkins extended, Sampson | 3 different direct LDL-C assays | 88 943 patients age > 18 years | NC | Martin-Hopkins extended |
| Zararsız et al, (2023) [13] | Friedewald, Martin-Hopkins, Martin-Hopkins extended, Sampson | 3 different direct LDL-C assays | 3908 children age < 18 years | NC | Martin-Hopkins extended |
| Steyn et al, (2023) [14] | Sampson, extended Martin-Hopkins | Direct LDL-C assay | 64 765 | NC | Martin-Hopkins extended |
| Bolat et al, (2023) [15] | Friedewald, Martin-Hopkins, extended Martin-Hopkins, Sampson | Direct LDL-C assay | 31,031 subjects divided into prediabetic, diabetic, and control groups | <18 years old, and with incomplete lipid profile, subjects with iron deficiency, anemia, hemoglobinopathy, thalassemia, liver disease or abnormal liver function tests, severe renal impairment or end-stage renal disease, pregnancy, and malignancy were excluded.  Samples with hemolysis or icterus were rejected. | Martin-Hopkins extended |
| In favour of Sampson | | | | | |
| Sampson et al, (2020) [16] | Friedewald, Martin-Hopkins, Sampson | **Beta quantification** and direct LDL-C assay | 8656 fasting patients | Parameters outside the 1st and 99th percentile VLDLC/TG>0.33 | Sampson |
| Piani et al, (2021) [17] | Friedewald, Martin-Hopkins, Sampson | Direct LDL-C assay | 114 774 italians | NC | Sampson, Martin, Vujovic |
| Martínez-Morillo et al, (2021) [18] | Friedewald, Martin-Hopkins, Sampson | Direct LDL-C assay | 102 128 patients | TG > 9.0 mmol/L  CT>10.4 mmol/L | Sampson |
| Cicero et al, (2021) [19] | Friedewald, Sampson | Direct LDL-C assay | 2605 Children age < 18 years | NC | Sampson |
| Vargas-Vázquez et al, (2021) [20] | Friedewald, Martin-Hopkins, Sampson | **Ultracentrifugation** | 340 with familial combined hyperlipidemia | VLDL-C/TG > 0.69, ApoB < 90th percentile | Sampson |
| Sampson et al, (2022) [21] | Friedewald, Martin-Hopkins, Martin-Hopkins extended, Sampson | **Beta quantification** | 39 956 patients age > 18 years | TG>22.60 mmol/L  CT>25.9 mmol/L  TG [1.70- 11.30] mmol/L with VLDLC/TG>0.3 | Sampson |
| Sampson et al, (2022) [22] | Friedewald, Martin-Hopkins, Sampson, Sampson extended | **Beta quantification** | 24 713 dyslipidemic patients | Lipoprotein-X detectable electrophoresis and/or TG>33.9 mmol/L and/or TC>38.9 mmol/L | Sampson |
| Higgins et al, (2022) [23] | Friedewald, Sampson | **Ultracentrifugation** | 3161 fasting samples | NC | Sampson |
| Li et al, (2022) [24] | Friedewald, Sampson | Direct LDL-C assay | 12 989 patients with ACS | - Incomplete lipid profile or medical file  - Pregnancy  - Patients suffering from infectious diseases or undergoing cancer treatment. | Sampson |
| Xu et al, (2022) [25] | Friedewald, Martin-Hopkins, Vujovic, and Sampson | VAP | 26 patients before and after taking a daily breakfast | TG > 4.5 mmol/L  thyroid diseases, liver and kidney diseases, autoimmune diseases, cancer, or other severe medical illnesses. | In fasting situation: Friedewald  In post-prandial situation: Sampson |
| In favour of both | | | | | |
| Shi et al, (2022) [26] | Friedewald, Martin-Hopkins, Sampson | Direct LDL-C assay | 30 349 patients with ACS | Incomplete lipid profile | Sampson and Martin-Hopkins |
| Shi et al, (2022) [27] | Friedewald, Martin-Hopkins, Sampson | Direct LDL-C assay | 9 751 patients who have undergone  percutaneous coronary  coronary intervention (PCI) | Incomplete lipid profile | Sampson and Martin-Hopkins |
| Naser et al, (2022) [28] | Friedewald, Martin-Hopkins, Sampson | Direct LDL-C assay | 402 diabetes patients | Incomplete medical file | Sampson and Martin-Hopkins |
| Islam et al, (2023) [29] | Sampson and extended Martin-Hopkins | Direct LDL-C assay | 131 patients from paediatric population | TG <4.5 or >9.0 mmol/L | Sampson and Martin-Hopkins |
| Carelse et al, (2023) [30] | Friedewald, extended Martin-Hopkins, Sampson | Direct LDL-C assay | 44 194 lipid profiles | NC | Sampson (but the extended Martin/Hopkins may also be safely implemented) |
| Ćwiklińska et al, (2021) [31] | Friedewald, Martin-Hopkins, Vujovic, and Sampson | **Ultracentrifugation** and Direct LDL-C assay | 1 209 samples after overnight fasting | Diabetes, liver diseases, infections, active neoplasm, renal replacement therapy, immunosuppressive treatment including steroids and lipid-lowering therapy, except for statins. | Martin-Hopkins, Vujovic and Sampson more accurate than Friedewald |
| Briers et al, (2022) [32] | Friedewald, Martin-Hopkins, Sampson | **ApoB** (immune-nephelometry) | 1179 patients with cardiovascular risk | TG > 4.5 mmol/L | Martin-Hopkins (and, to a lesser extent, Sampson) is more closely associated with the number of LDL particles than Friedewald |
| **Articles comparing the 3 equations to each other’s** | | | | | |
| Sun et al, (2023) [33] | Friedewald, Martin-Hopkins, Sampson | NC | 22 679 patients (>18 years) form Biochemistry laboratory and 3415 from lipid clinic | Exclusion of familial chylomicronemia syndrome, familial dysbetalipoproteinemia and familial hypercholesterolemia (FH) | Sampson and Martin-Hopkins  Sampson should not be used in FH |
| Zafrir et al, (2020) [34] | Friedewald, Martin-Hopkins, Sampson | NC | 10 006 patients with metabolic syndrome | NC | Sampson and Martin-Hopkins |
| Dinç Asarcıklı et al, (2021) [35] | Friedewald, Martin-Hopkins, Sampson | NC | 4 196 patients | NC | No clinical impact on change of equation |
| Sajja et al, (2022) [36] | Friedewald, Martin-Hopkins, Sampson | NC | 146 106 patients with atherosclerotic cardiovascular disease | TG > 4.5 mmol/L | Martin-Hopkins |
| Bae et al, (2023) [37] | Friedewald, Martin-Hopkins and Sampson | NC | 4 351 patients with insulin resistance | TG > 25,86 mmol/L  Missing data (use of insuline, incomplete lipid profiles) | Martin-Hopkins |
| Sun et al, (2023) [38] | Friedewald, Martin-Hopkins, Sampson | NC | 26 094 patients including 2 populations of dyslipidemic | NC | Martin-Hopkins |
| Zhao et al, (2023) [39] | Friedewald, Sampson | NC | 9 493 dylipidemics patients | NC | Sampson |

*VAP Vertical Auto Profile, UCF Ultracentrifugation, BQ Beta quantification*

**Flow Charts of the study population**

Supplemental Figure 1. Flow charts of the study population


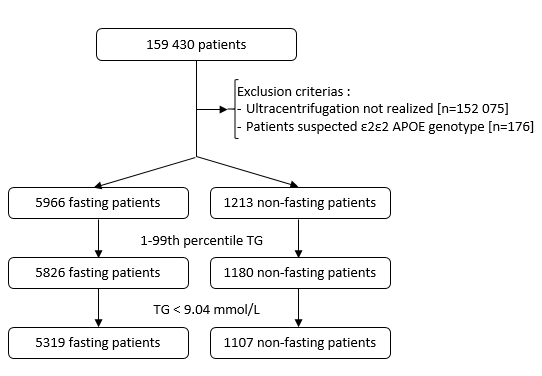


**Supplemental Material**

Lipid profiles were determined at Hospices Civils de Lyon and were ISO15189-accredited since 2016. This lab participates in the Probioqual External Quality Control program to ensure accuracy and precision of measurements. Analytical performances of lipid measures met guideline-established benchmarks.

Between-day inter-assay reproducibility coefficients of variation for TC, TG, HDL-C and ApoB were <1.5%, <5.5%, <3.5% and <3% respectively, below the EFLM recommendations [40].

**Patients with fasting samples**

Supplemental Figure 2. Correlation Calculated vs Ultracentrifugation Low-Density Lipoprotein Cholesterol (LDL-C) levels on fasting population (n = 5826)


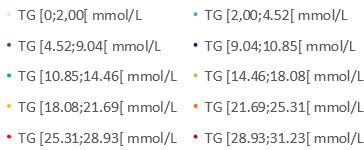


R2=1

Regression line

Supplemental Figure 3. Correlation Calculated vs Ultracentrifugation Low-Density Lipoprotein Cholesterol (LDL-C) levels on fasting population focus on TG ≤ 9.04 mmol/L (n = 5241)

R2= 1

Regression line

Supplemental Figure 4. Residual Error Plots for Low-Density Lipoprotein Cholesterol by TG levels on fasting population

A/ for TG ≤ 9.04 mmol/L on fasting population (n=5241)

Equation for TG <2.00 mmol/L (n=1590)

F = y = -0.04x - 5E-3 R² = 6E-3

S= y = 0.03x - 0.05 R² = 2E-3

M= y = 0.07x - 0.14 R² = 0.01

Equation for TG of 2.00 to 4.51 mmol/L (n=1409)

F = y = -0.18x + 0.44 R² = 0.02

S= y = -0.06x + 0.09 R² = 2E-3

M= y = -0.03x + 0.28 R² = 6E-4

Equation for TG of 4.52 to 9.04 mmol/L (n=2242)

F = y = -0.09x + 0.05 R² = 0.03

S = y = 2E-4x - 0.15 R² = 2E-7

M= y = 0.10x - 0.25 R² = 0.04

B/ For the whole fasting population (n=5826)


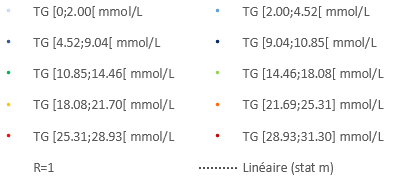


Regression line

Supplemental Figure 5. Residual Error Plots for Low-Density Lipoprotein Cholesterol by Non-HDL-C levels on fasting population (n=5826)


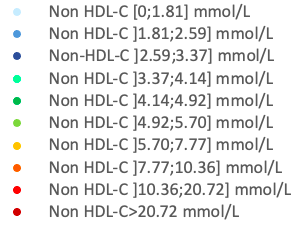


Regression line

Residual error plot for low-density lipoprotein cholesterol by TG and Non-HDL-C levels show that Sampson equation seems to be the better equation with the lowest R2 and the lowest slope, whereas Friedewald and Martin-Hopkins equations presented bias.

Supplemental Figure 6. MAD score for TG intervals on fasting population (TG ≤ 9.04 mmol/L) (n=5241)

| *MAD score for TG intervals* | | |  |  | |
| --- | --- | --- | --- | --- | --- |
| **TG (mmol/L)** | [0 – 2.00[ | [2.00 – 4.52[ | | | [4.52 – 9.04] |
| **N** | 1590 | 1409 | | | 2242 |
| **uLDL-C** | 0.82 | 0.98 | | | 1.01 |
| **F-cLDL-C** | 0.81 | 1.05 | | | 1.21 |
| **S-cLDL-C** | 0.80 | 0.93 | | | 0.98 |
| **MH-cLDL-C** | 0.85 | 0.92 | | | 0.97 |

F-LDL-C

uLDL-C

S-LDL-C

MH-LDL-C

F-LDL-C

MH-LDL-C

S-LDL-C

uLDL-C

For patients with TG < 4.52 mmol/L all equations had similar MAD score but Friedewald equation had slightly lesser MAD score. For samples with TG ≥ 4.52 mmol/L, differences are more important. Up to 9.04 mmol/L, MAD score of Sampson and Martin-Hopkins equations are close to MAD score of ultra-LDL-c.

Supplemental Table 2. Difference in mmol/L between the median of uLDL-C and cLDL-C on fasting population (n=5826)

| TG mmol/L  U-LDL-C mmol/L | < 2.00 mmol/L | 2.00-4.52 mmol/L | 4.52-9.04 mmol/L |
| --- | --- | --- | --- |
| < 1.80 mmol/L | F = -0.08 (-0.26;0.02)  S = -0.10 (-0.23;0.10)  MH = -0.09 (-0.16;0.15) | F = -0.50 (-0.67;-0.29)  S = -0.09 (-0.24;0.12)  MH = 0.24 (0.05;0.44) | *F = -0.72 (-1.09;-0.38)*  S = -0.05 (-0.31;0.25)  MH = 0.47 (0.25;0.81) |
| ≥ 1.80 mmol/L | F = -0.03 (-0.14;0.04)  S = 0.01 (-0.09;0.09)  M = -0.03 (-0.14;0.07) | F = -0.35 (-0.56;-0.10)  S = -0.16 (-0.37;0.09)  M = 0.11 (-0.11;0.36) | *F = -0.48 (-0.84;-0.14)*  S = -0.20 (-0.49;0.08)  MH = 0.25 (-0.04;0.48) |
| Total | F = -0.04 (-0.15;0.03)  S = 0.00 (-0.11;0.09)  MH = -0.03 (-0.14;0.08) | F = -0.38 (-0.59;-0.13)  S = -0.15 (-0.36;0.09)  MH = 0.18 (-0.08;0.38) | *F = -0.53 (-0.88;-0.17)*  S = -0.18 (-0.46;0.11)  MH = 0.30 (0.01;0.60) |

*For TG values > 4,52 mmol/L, Friedewaldequation is not available.*

*Results presented as mediane (25th percentile;75th percentile)*

Supplemental Table 3. Misclassification table on fasting population

To verify the accuracy of Sampson equation up to TG values of 9.04 mmol/L (i.e. 800 mg/dL), we performed the misclassification rate for the categorization of patients into different LDL-C treatment groups. We did it for TG levels less than 4.52 mmol/L and for TG levels less than 9.04 mmol/L. Overall, we found the same results as Sampson had already shown: the misclassification rate for TG levels less than 9.04 mmol/L with Sampson equation nearly approached the same misclassification rate for Friedewald equation for TG less than 4.52 mmol/L. This misclassification corresponds to about 31% of the calculated LDL-C values.

3A. Misclassification table for TG < 4.52 mmol/L (n=2999)

|  | LDL-C by ultracentrifugation | | | | | | | |  |
| --- | --- | --- | --- | --- | --- | --- | --- | --- | --- |
|  | Categories of LDL-C rate (mmol/L) | 1 : ≤1.41 | 2 : ]1.41-1.80] | 3 : ]1.80-2.57] | 4 : ]2.56-3.34] | 5 : ]3.34-4.90] | 6 : >4.90 | Total patients |
| F-LDL-C | 1 : ≤1.41 | 61 | 80 | 45 | 1 |  |  | 187 |
| 2 : ]1.41-1.80] | 3 | 24 | 89 | 1 | 1 |  | 118 |
| 3 : ]1.80-2.57] |  | 11 | 786 | 245 | 56 |  | 1098 |
| 4 : ]2.56-3.34] |  |  | 16 | 78 | 145 |  | 239 |
| 5 : ]3.34-4.90] | 1 |  | 9 | 82 | 936 | 111 | 1139 |
| 6 : >4.90 |  |  | 2 |  | 20 | 196 | 218 |
|  | Total patients | 65 | 115 | 947 | 407 | 1158 | 307 | 2999 |
|  |  | | | | | | | |
|  | Same classification | 93.85% | 20.87% | 83.00% | 19.16% | 80.83% | 63.84% | 69.39% |
|  | **Total**  **misclassification** | **6.15%** | **79.13%** | **17.00%** | **80.84%** | **19.17%** | **36.16%** | **30.61%** |
|  | Lower misclassified by Friedewald | 0.00% | 69.57% | 14.15% | 60.69% | 17.44% | 36.16% | 25.81% |
|  | Upper misclassified by Friedewald | 6.15% | 9.57% | 1.69% | 20.15% | 1.73% | 0.00% | 4.80% |
|  | 95% confidence interval of Kappa =[0.55 ;0.59] | | | | | | | |

|  | LDL-C by ultracentrifugation | | | | | | | |  |
| --- | --- | --- | --- | --- | --- | --- | --- | --- | --- |
|  | Categories of LDL-C rate (mmol/L) | 1 : ≤1.41 | 2 : ]1.41-1.80] | 3 : ]1.80-2.57] | 4 : ]2.56-3.34] | 5 : ]3.34-4.90] | 6 : >4.90 | Total patients |
| MH-LDL-C | 1 : ≤1.41 | 38 | 7 | 1 |  |  |  | 46 |
| 2 : ]1.41-1.80] | 20 | 49 | 11 | 1 |  |  | 81 |
| 3 : ]1.80-2.57] | 6 | 55 | 799 | 136 | 7 |  | 1003 |
| 4 : ]2.56-3.34] |  | 3 | 101 | 155 | 126 |  | 385 |
| 5 : ]3.34-4.90] | 1 | 1 | 33 | 113 | 986 | 91 | 1225 |
| 6 : >4.90 |  |  | 2 | 2 | 39 | 216 | 259 |
|  | Total patients | 65 | 115 | 947 | 407 | 1158 | 307 | 2999 |
|  |  | | | | | | | |
|  | Same classification | 58.46% | 42.61% | 84.37% | 38.08% | 85.15% | 70.36% | 74.79% |
|  | **Total misclassification** | **41.54%** | **57.39%** | **15.63%** | **61.92%** | **14.85%** | **29.64%** | **25.21%** |
|  | lower misclassified by Martin-Hopkins | 41.54% | 47.83% | 10.67% | 28.26% | 3.37% | 0.00% | 12.54% |
|  | upper misclassified by Martin-Hopkins | 0.00% | 6.09% | 1.27% | 33.66% | 11.49% | 29.64% | 12.67% |
|  | 95% confidence interval of Kappa =[0.62 ;0.67] | | | | | | | |

|  | LDL-C by ultracentrifugation | | | | | | | |  |
| --- | --- | --- | --- | --- | --- | --- | --- | --- | --- |
|  | Categories of LDL-C rate (mmol/L) | 1 : ≤1.41 | 2 : ]1.41-1.80] | 3 : ]1.80-2.57] | 4 : ]2.56-3.34] | 5 : ]3.34-4.90] | 6 : >4.90 | Total patients |
| S-LDL-C | 1 : ≤1.41 | 54 | 39 | 5 |  |  |  | 98 |
| 2 : ]1.41-1.80] | 8 | 48 | 48 | 1 |  |  | 105 |
| 3 : ]1.80-2.57] | 2 | 27 | 828 | 177 | 17 |  | 1051 |
| 4 : ]2.56-3.34] |  | 1 | 50 | 116 | 93 |  | 260 |
| 5 : ]3.34-4.90] | 1 |  | 14 | 113 | 1025 | 103 | 1256 |
| 6 : >4.90 |  |  | 2 |  | 23 | 204 | 229 |
| Total patients | 65 | 115 | 947 | 407 | 1158 | 307 | 2999 |
|  |  | | | | | | | |
|  | Same classification | 83.08% | 41.74% | 87.43% | 28.50% | 88.51% | 66.45% | 75.86% |
|  | **Total misclassification** | 16.92% | 58.26% | 12.57% | 71.50% | 11.49% | 33.55% | 24.14% |
|  | Lower misclassified by Sampson | 16.92% | 23.48% | 5.28% | 27.76% | 1.99% | 0.00% | 8.04% |
|  | Upper misclassified by Sampson | 0.00% | 33.91% | 5.60% | 43.73% | 9.50% | 33.55% | 16.11% |
|  | 95% confidence interval of Kappa =[0.64 ;0.68] | | | | | | | |

3B. Misclassification table for 4.52 ≤ TG < 9.04 mmol/L (n=2241)

|  | LDL-C measured by ultracentrifugation | | | | | | | |
| --- | --- | --- | --- | --- | --- | --- | --- | --- |
|  | Categories of LDL-C rate (mmol/L) | 1 : <1.4 | 2 : 1.4-<1.8 | 3 : 1.8-<2.6 | 4 : 2.6-<3.0 | 5 : 3.0-<4.9 | 6 : >=4.9 | Total patients |
| F-LDL-C | 1 : <1.4 | 151 | 184 | 173 | 26 | 3 |  | 537 |
| 2 : 1.4-<1.8 | 6 | 27 | 174 | 24 | 14 | 1 | 246 |
| 3 : 1.8-<2.6 | 3 | 15 | 198 | 149 | 128 | 1 | 494 |
| 4 : 2.6-<3.0 |  |  | 22 | 52 | 146 |  | 220 |
| 5 : 3.0-<4.9 |  | 2 | 18 | 22 | 499 | 48 | 589 |
| 6 : >=4.9 |  |  | 3 |  | 31 | 121 | 155 |
|  | Total patients | 160 | 228 | 588 | 273 | 821 | 171 | 2241 |
|  |  | | | | | | | |
|  | Same classification | 94.38% | 11.84% | 33.67% | 19.05% | 60.78% | 70.76% | 46.76% |
|  | Total misclassification | 5.63% | 88.16% | 66.33% | 80.95% | 39.22% | 29.24% | 53.24% |
|  | Lower misclassified by Friedewald | 0.00% | 80.70% | 59.01% | 72.89% | 35.44% | 28.65% | 47.75% |
|  | Upper misclassified by Friedewald | 5.63% | 6.58% | 3.74% | 8.06% | 3.78% | 0.00% | 5.44% |
|  | 95% confidence interval of Kappa = [0.31 ;0.36] | | | | | | | |

|  | LDL-C measured by ultracentrifugation | | | | | | | |  |
| --- | --- | --- | --- | --- | --- | --- | --- | --- | --- |
|  | Categories of LDL-C rate (mmol/L) | 1 : <1.4 | 2 : 1.4-<1.8 | 3 : 1.8-<2.6 | 4 : 2.6-<3.0 | 5 : 3.0-<4.9 | 6 : >=4.9 | Total patients |
| MH-LDL-C | 1 : <1.4 | 35 | 8 | 6 |  |  |  | 49 |
| 2 : 1.4-<1.8 | 62 | 47 | 13 |  |  |  | 122 |
| 3 : 1.8-<2.6 | 58 | 138 | 257 | 29 | 4 | 1 | 487 |
| 4 : 2.6-<3.0 | 5 | 26 | 179 | 92 | 33 |  | 335 |
| 5 : 3.0-<4.9 |  | 8 | 128 | 152 | 708 | 23 | 1019 |
| 6 : >=4.9 |  | 1 | 5 |  | 76 | 147 | 229 |
|  | Total patients | 160 | 228 | 588 | 273 | 821 | 171 | 2241 |
|  |  | | | | | | | |
|  | Same classification | 21.88% | 20.61% | 43.71% | 33.70% | 86.24% | 85.96% | 57.39% |
|  | Total misclassification | 78.13% | 79.39% | 56.29% | 66.30% | 13.76% | 14.04% | 42.61% |
|  | Lower misclassified by Martin-Hopkins | 0.00% | 3.51% | 3.23% | 10.62% | 4.51% | 14.04% | 5.22% |
|  | Upper misclassified by Martin-Hopkins | 78.13% | 60.53% | 30.44% | 55.68% | 9.26% | 0.00% | 37.39% |
|  | 95% confidence interval of Kappa = [0.40 ;0.45] | | | | | | | |

|  | LDL-C measured by ultracentrifugation | | | | | | | |
| --- | --- | --- | --- | --- | --- | --- | --- | --- |
|  | Categories of LDL-C rate (mmol/L) | 1 : <1.4 | 2 : 1.4-<1.8 | 3 : 1.8-<2.6 | 4 : 2.6-<3.0 | 5 : 3.0-<4.9 | 6 : >=4.9 | Total patients |
| S-LDL-C | 1 : <1.4 | 120 | 86 | 33 | 1 |  |  | 240 |
| 2 : 1.4-<1.8 | 25 | 76 | 95 | 9 |  |  | 205 |
| 3 : 1.8-<2.6 | 15 | 60 | 346 | 122 | 52 | 1 | 596 |
| 4 : 2.6-<3.0 |  | 4 | 78 | 88 | 133 | 1 | 304 |
| 5 : 3.0-<4.9 |  | 2 | 33 | 53 | 617 | 52 | 757 |
| 6 : >=4.9 |  |  | 3 |  | 19 | 117 | 139 |
|  | Total patients | 160 | 228 | 588 | 273 | 821 | 171 | 2241 |
|  |  | | | | | | | |
|  | Same classification | 75.00% | 33.33% | 58.84% | 32.23% | 75.15% | 68.42% | 60.87% |
|  | Total misclassification | 25.00% | 66.67% | 41.16% | 67.77% | 24.85% | 31.58% | 39.13% |
|  | Lower misclassified by Sampson | 0.00% | 37.72% | 21.77% | 48.35% | 22.53% | 31.58% | 26.10% |
|  | Upper misclassified by Sampson | 25.00% | 26.32% | 13.27% | 19.41% | 2.31% | 0.00% | 13.03% |
|  | 95% confidence interval of Kappa = [0.47 ;0.52] | | | | | | | |

3C. Misclassification table for TG ≤ 9.04 mmol/L (n=5241)

|  | LDL-C by ultracentrifugation | | | | | | | |  |
| --- | --- | --- | --- | --- | --- | --- | --- | --- | --- |
|  | Categories of LDL-C rate (mmol/L) | 1 : ≤1.41 | 2 : ]1.41-1.80] | 3 : ]1.80-2.57] | 4 : ]2.56-3.34] | 5 : ]3.34-4.90] | 6 : >4.90 | Total patients |
| F-LDL-C | 1 : ≤1.41 | 212 | 264 | 218 | 27 | 3 |  | 724 |
| 2 : ]1.41-1.80] | 9 | 51 | 263 | 25 | 15 | 1 | 364 |
| 3 : ]1.80-2.57] | 3 | 26 | 984 | 394 | 184 | 1 | 1592 |
| 4 : ]2.56-3.34] |  |  | 38 | 130 | 292 |  | 460 |
| 5 : ]3.34-4.90] | 1 | 2 | 27 | 104 | 1435 | 159 | 1728 |
| 6 : >4.90 |  |  | 5 |  | 51 | 317 | 373 |
|  | Total patients | 225 | 343 | 1535 | 680 | 1980 | 478 | 5241 |
|  |  | | | | | | | |
|  | Same classification | 94.22% | 14.87% | 64.10% | 19.12% | 72.47% | 66.32% | 59.70% |
|  | Total misclassification | 5.78% | 85.13% | 35.90% | 80.88% | 27.53% | 33.47% | **40.28%** |
|  | Lower misclassified by Friedewald | 0.00% | 76.97% | 31.34% | 65.59% | 24.95% | 33.47% | 35.20% |
|  | Upper misclassified by Friedewald | 5.78% | 7.58% | 2.48% | 15.29% | 2.58% | 0.00% | 5.08% |
|  | 95% confidence interval of Kappa = [0.45 ;0.49] | | | | | | | |

|  | LDL-C by ultracentrifugation | | | | | | | |  |
| --- | --- | --- | --- | --- | --- | --- | --- | --- | --- |
|  | Categories of LDL-C rate (mmol/L) | 1 : ≤1.41 | 2 : ]1.41-1.80] | 3 : ]1.80-2.57] | 4 : ]2.56-3.34] | 5 : ]3.34-4.90] | 6 : >4.90 | Total patients |
| MH-LDL-C | 1 : ≤1.41 | 73 | 15 | 7 |  |  |  | 95 |
| 2 : ]1.41-1.80] | 82 | 96 | 24 | 1 |  |  | 203 |
| 3 : ]1.80-2.57] | 64 | 193 | 1056 | 165 | 11 | 1 | 1490 |
| 4 : ]2.56-3.34] | 5 | 29 | 280 | 247 | 159 |  | 720 |
| 5 : ]3.34-4.90] | 1 | 9 | 161 | 265 | 1695 | 114 | 2245 |
| 6 : >4.90 |  | 1 | 7 | 2 | 115 | 363 | 488 |
|  | Total patients | 225 | 343 | 1535 | 680 | 1980 | 478 | 5241 |
|  |  | | | | | | | |
|  | Same classification | 32.44% | 27.99% | 68.79% | 36.32% | 85.61% | 75.94% | 67.35% |
|  | Total misclassification | 67.56% | 72.01% | 31.21% | 63.68% | 14.39% | 24.06% | 32.65% |
|  | Lower misclassified by Martin-Hopkins | 67.56% | 56.27% | 18.24% | 39.26% | 5.81% | 0.00% | 23.16% |
|  | Upper misclassified by Martin-Hopkins | 0.00% | 4.37% | 2.02% | 24.41% | 8.59% | 24.06% | 9.48% |
|  | 95% confidence interval of Kappa = [0.53 ;0.57] | | | | | | | |
|  | LDL-C by ultracentrifugation | | | | | | | |  | |
|  | Categories of LDL-C rate (mmol/L) | 1 : ≤1.41 | 2 : ]1.41-1.80] | 3 : ]1.80-2.57] | 4 : ]2.56-3.34] | 5 : ]3.34-4.90] | 6 : >4.90 | Total patients |
| S-LDL-C | 1 : ≤1.41 | 174 | 125 | 38 | 1 |  |  | 338 |
| 2 : ]1.41-1.80] | 33 | 124 | 143 | 10 |  |  | 310 |
| 3 : ]1.80-2.57] | 17 | 87 | 1174 | 299 | 69 | 1 | 1647 |
| 4 : ]2.56-3.34] |  | 5 | 128 | 204 | 226 | 1 | 564 |
| 5 : ]3.34-4.90] | 1 | 2 | 47 | 166 | 1643 | 155 | 2014 |
| 6 : >4.90 |  |  | 5 |  | 42 | 321 | 368 |
|  | Total patients | 225 | 343 | 1535 | 680 | 1980 | 478 | 5241 |
|  |  | | | | | | | |
|  | Same classification | 77.33% | 36.15% | 76.48% | 30.00% | 82.98% | 67.15% | 69.45% |
|  | Total misclassification | 22.67% | 63.85% | 23.52% | 70.00% | 17.02% | 32.85% | **30.55%** |
|  | % lower misclassified by Sampson | 0.00% | 36.44% | 11.79% | 45.59% | 14.90% | 32.85% | 20.38% |
|  | % upper misclassified by Sampson | 22.67% | 25.36% | 8.34% | 24.41% | 2.12% | 0.00% | 10.17% |
|  | 95% confidence interval of Kappa = [0.57 ;0.60] | | | | | | | |

3D. Misclassification in the overall fasting population (n=5826)

|  | LDL-C measured by ultracentrifugation | | | | | | | |
| --- | --- | --- | --- | --- | --- | --- | --- | --- |
|  | Categories of LDL-C rate (mmol/L) | 1 : <1.4 | 2 : 1.4-<1.8 | 3 : 1.8-<2.6 | 4 : 2.6-<3.0 | 5 : 3.0-<4.9 | 6 : >=4.9 | Total patients |
| F-LDL-C | 1 : <1.4 | 346 | 335 | 328 | 73 | 3 |  | 1085 |
| 2 : 1.4-<1.8 | 11 | 58 | 281 | 38 | 15 | 1 | 404 |
| 3 : 1.8-<2.6 | 9 | 35 | 1000 | 426 | 184 | 1 | 1655 |
| 4 : 2.6-<3.0 |  | 1 | 46 | 148 | 292 |  | 487 |
| 5 : 3.0-<4.9 | 4 | 2 | 36 | 138 | 1440 | 159 | 1779 |
| 6 : >=4.9 | 1 | 1 | 15 | 23 | 59 | 317 | 416 |
|  | Total patients | 371 | 432 | 1706 | 846 | 1993 | 478 | 5826 |
|  |  | | | | | | | |
|  | Same classification | 93.26% | 13.43% | 58.62% | 17.49% | 72.25% | 66.32% | 56.80% |
|  | Total misclassification | 6.74% | 86.57% | 41.38% | 82.51% | 27.75% | 33.47% | **43.19%** |
|  | Lower misclassified by Friedewald | 6.74% | 8.10% | 2.70% | 19.03% | 2.96% | 0.00% | 6.54% |
|  | Upper misclassified by Friedewald | 0.00% | 77.55% | 35.70% | 63.48% | 24.79% | 33.47% | 36.65% |
|  | 95% confidence interval of Kappa = [0.43 ; 0.46] | | | | | | | |

|  | LDL-C measured by ultracentrifugation | | | | | | | |  |
| --- | --- | --- | --- | --- | --- | --- | --- | --- | --- |
|  | Categories of LDL-C rate (mmol/L) | 1 : <1.4 | 2 : 1.4-<1.8 | 3 : 1.8-<2.6 | 4 : 2.6-<3.0 | 5 : 3.0-<4.9 | 6 : >=4.9 | Total patients |
| MH-LDL-C | 1 : <1.4 | 155 | 46 | 33 | 5 |  |  | 239 |
| 2 : 1.4-<1.8 | 99 | 106 | 41 | 4 |  |  | 250 |
| 3 : 1.8-<2.6 | 94 | 223 | 1112 | 193 | 11 | 1 | 1634 |
| 4 : 2.6-<3.0 | 10 | 33 | 311 | 266 | 159 |  | 779 |
| 5 : 3.0-<4.9 | 10 | 21 | 185 | 331 | 1698 | 114 | 2359 |
| 6 : >=4.9 | 3 | 3 | 24 | 47 | 125 | 363 | 565 |
|  | Total patients | 371 | 432 | 1706 | 846 | 1993 | 478 | 5826 |
|  |  | | | | | | | |
|  | Same classification | 41.78% | 24.54% | 65.18% | 31.44% | 85.20% | 100.00% | 64.79% |
|  | Total misclassification | 58.22% | 75.46% | 34.82% | 68.56% | 14.80% | 31.68% | **37.23%** |
|  | Lower misclassified by Martin-Hopkins | 0.00% | 10.65% | 4.34% | 23.88% | 8.53% | 31.68% | 10.63% |
|  | upper misclassified by Martin-Hopkins | 58.22% | 51.62% | 18.23% | 44.68% | 6.27% | 0.00% | 26.60% |
|  | 95% confidence interval of Kappa = [0.50;0.53] | | | | | | | |

|  | LDL-C measured by ultracentrifugation | | | | | | | |
| --- | --- | --- | --- | --- | --- | --- | --- | --- |
| Categories of LDL-C rate (mmol/L) | 1 : <1.4 | 2 : 1.4-<1.8 | 3 : 1.8-<2.6 | 4 : 2.6-<3.0 | 5 : 3.0-<4.9 | 6 : >=4.9 | Total patients |
| S-LDL-C | 1 : <1.4 | 274 | 162 | 80 | 14 | 1 |  | 531 |
| 2 : 1.4-<1.8 | 61 | 148 | 175 | 28 |  |  | 412 |
| 3 : 1.8-<2.6 | 31 | 109 | 1242 | 350 | 69 | 1 | 1802 |
| 4 : 2.6-<3.0 | 1 | 10 | 143 | 231 | 226 | 1 | 612 |
| 5 : 3.0-<4.9 | 4 | 3 | 60 | 214 | 1649 | 155 | 2085 |
| 6 : >=4.9 |  |  | 6 | 9 | 48 | 321 | 384 |
|  | Total patients | 371 | 432 | 1706 | 846 | 1993 | 478 | 5826 |
|  |  | | | | | | | |
|  | Same classification | 73.85% | 34.26% | 72.80% | 27.30% | 82.74% | 67.15% | 66.34% |
|  | Total misclassification | 26.15% | 65.74% | 27.20% | 72.70% | 17.26% | 32.85% | **33.66%** |
|  | Lower misclassified by Sampson | 26.15% | 25.23% | 8.38% | 26.36% | 2.41% | 0.00% | 12.00% |
|  | Upper misclassified by Sampson | 0.00% | 37.50% | 14.95% | 46.34% | 14.85% | 32.85% | 21.66% |
|  | 95% confidence interval of Kappa = [0.54 ; 0.57] | | | | | | | |

Supplemental Table 4. Classification table for cLDL-c<1.80mmol/L and TG<4.52 mmol/L on fasting population

|  | F-LDL-C | | | |  |
| --- | --- | --- | --- | --- | --- |
|  | Categories of LDL-C rate (mmol/L) | 1 : ≤1.41 | 2 : ]1.41-1.80] | Total patients |
| U-LDL-C | 1 : ≤1.41 | 61 | 3 | 64 |
| 2 : ]1.41-1.80] | 80 | 24 | 104 |
| 3 : ]1.80-2.57] | 45 | 89 | 134 |
| 4 : ]2.56-3.34] | 1 | 1 | 2 |
| 5 : ]3.34-4.90] |  | 1 | 1 |
| 6 : >4.90 |  |  | 0 |
|  | Total patients | 187 | 118 | 305 |
|  |  | | | |
|  | Same classification | 32.62% | 20.34% | 27.87% |
|  | Total reclassification | 67.38% | 79.66% | 72.13% |
|  | Lower classification by ultracentrifugation | 0.00% | 2.54% | 0.98% |
|  | Upper classification by ultracentrifugation | 67.38% | 75.42% | **71.15%** |

|  | S-LDL-C | | | |  |
| --- | --- | --- | --- | --- | --- |
|  | Categories of LDL-C rate (mmol/L) | 1 : ≤1.41 | 2 : ]1.41-1.80] | Total patients |
| U-LDL-C | 1 : ≤1.41 | 54 | 8 | 62 |
| 2 : ]1.41-1.80] | 39 | 48 | 87 |
| 3 : ]1.80-2.57] | 5 | 48 | 53 |
| 4 : ]2.56-3.34] |  | 1 | 1 |
| 5 : ]3.34-4.90] |  |  | 0 |
| 6 : >4.90 |  |  | 0 |
| Total patients | 98 | 105 | 203 |
|  |  | | | |
|  | Same classification | 55.10% | 45.71% | 50.25% |
|  | Total reclassification | 44.90% | 54.29% | 49.75% |
|  | Lower classification by ultracentrifugation | 0.00% | 7.62% | 3.94% |
|  | Upper classification by ultracentrifugation | 44.90% | 45.71% | **45.81%** |

|  | MH-LDL-C | | | |  |
| --- | --- | --- | --- | --- | --- |
|  | Categories of LDL-C rate (mmol/L) | 1 : ≤1.41 | 2 : ]1.41-1.80] | Total patients |
| U-LDL-C | 1 : ≤1.41 | 38 | 20 | 58 |
| 2 : ]1.41-1.80] | 7 | 49 | 56 |
| 3 : ]1.80-2.57] | 1 | 11 | 12 |
| 4 : ]2.56-3.34] |  | 1 | 1 |
| 5 : ]3.34-4.90] |  |  | 0 |
| 6 : >4.90 |  |  | 0 |
|  | Total patients | 46 | 81 | 127 |
|  |  | | | |
|  | Same classification | 82.61% | 60.49% | 68.50% |
|  | Total reclassification | 17.39% | 39.51% | 31.50% |
|  | Lower classification by ultracentrifugation | 0.00% | 24.69% | 15.75% |
|  | Upper classification by ultracentrifugation | 17.39% | 13.58% | **15.75%** |

**Patients in postprandial state**

Supplemental Figure 7. Correlation uLDL-c vs calculated LDL-c on the overall non-fasting population (n = 1180)


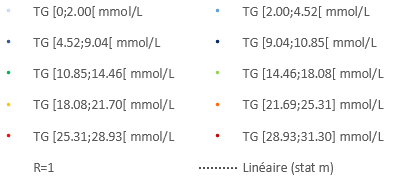


R2=1

Regression line

Supplemental Figure 8. Correlation uLDL-C vs calculated LDL-C for TG ≤ 9.04 mmol/L in postprandial state (n = 1107)

R2= 1

Regression line

Supplemental Figure 9. Residual Error Plots for Low-Density Lipoprotein Cholesterol for TG ≤ 9.04 mmol/L in postprandial state (n=1107)

Equation for TG <2.00 mmol/L (n=253)

F = y = -0.19x + 0.23 R² = 0.01

S= y = -0.14x + 0.22 R² = 7E-3

MH= y = -0.05x + 0.07 R² = 1E-3

Equation for TG of 2.00 to 4.51 mmol/L (n=428)

F = y = -0.17x - 3E-3 R² = 0.02

S= y = -0.14 + 0.10 R² = 0.02

MH= y = -0.05x + 0.05 R² = 0.03

Equation for TG of 4.52 to 9.04 mmol/L (n=426)

F = y = -0.19x + 0.19 R² = 0.07

S = y = -0.12x + 0.11 R² = 0.02

MH= y = 7E-3x – 0.10 R² = 1E-4

Supplemental Figure 10. Residual Error Plots for Low-Density Lipoprotein Cholesterol by Non-HDL-c levels on non-fasting population (n=1180)


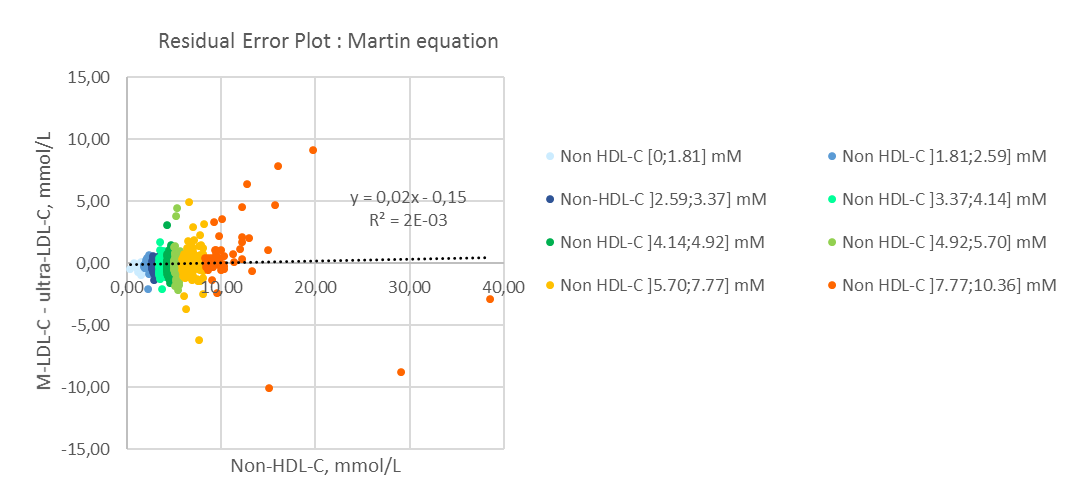


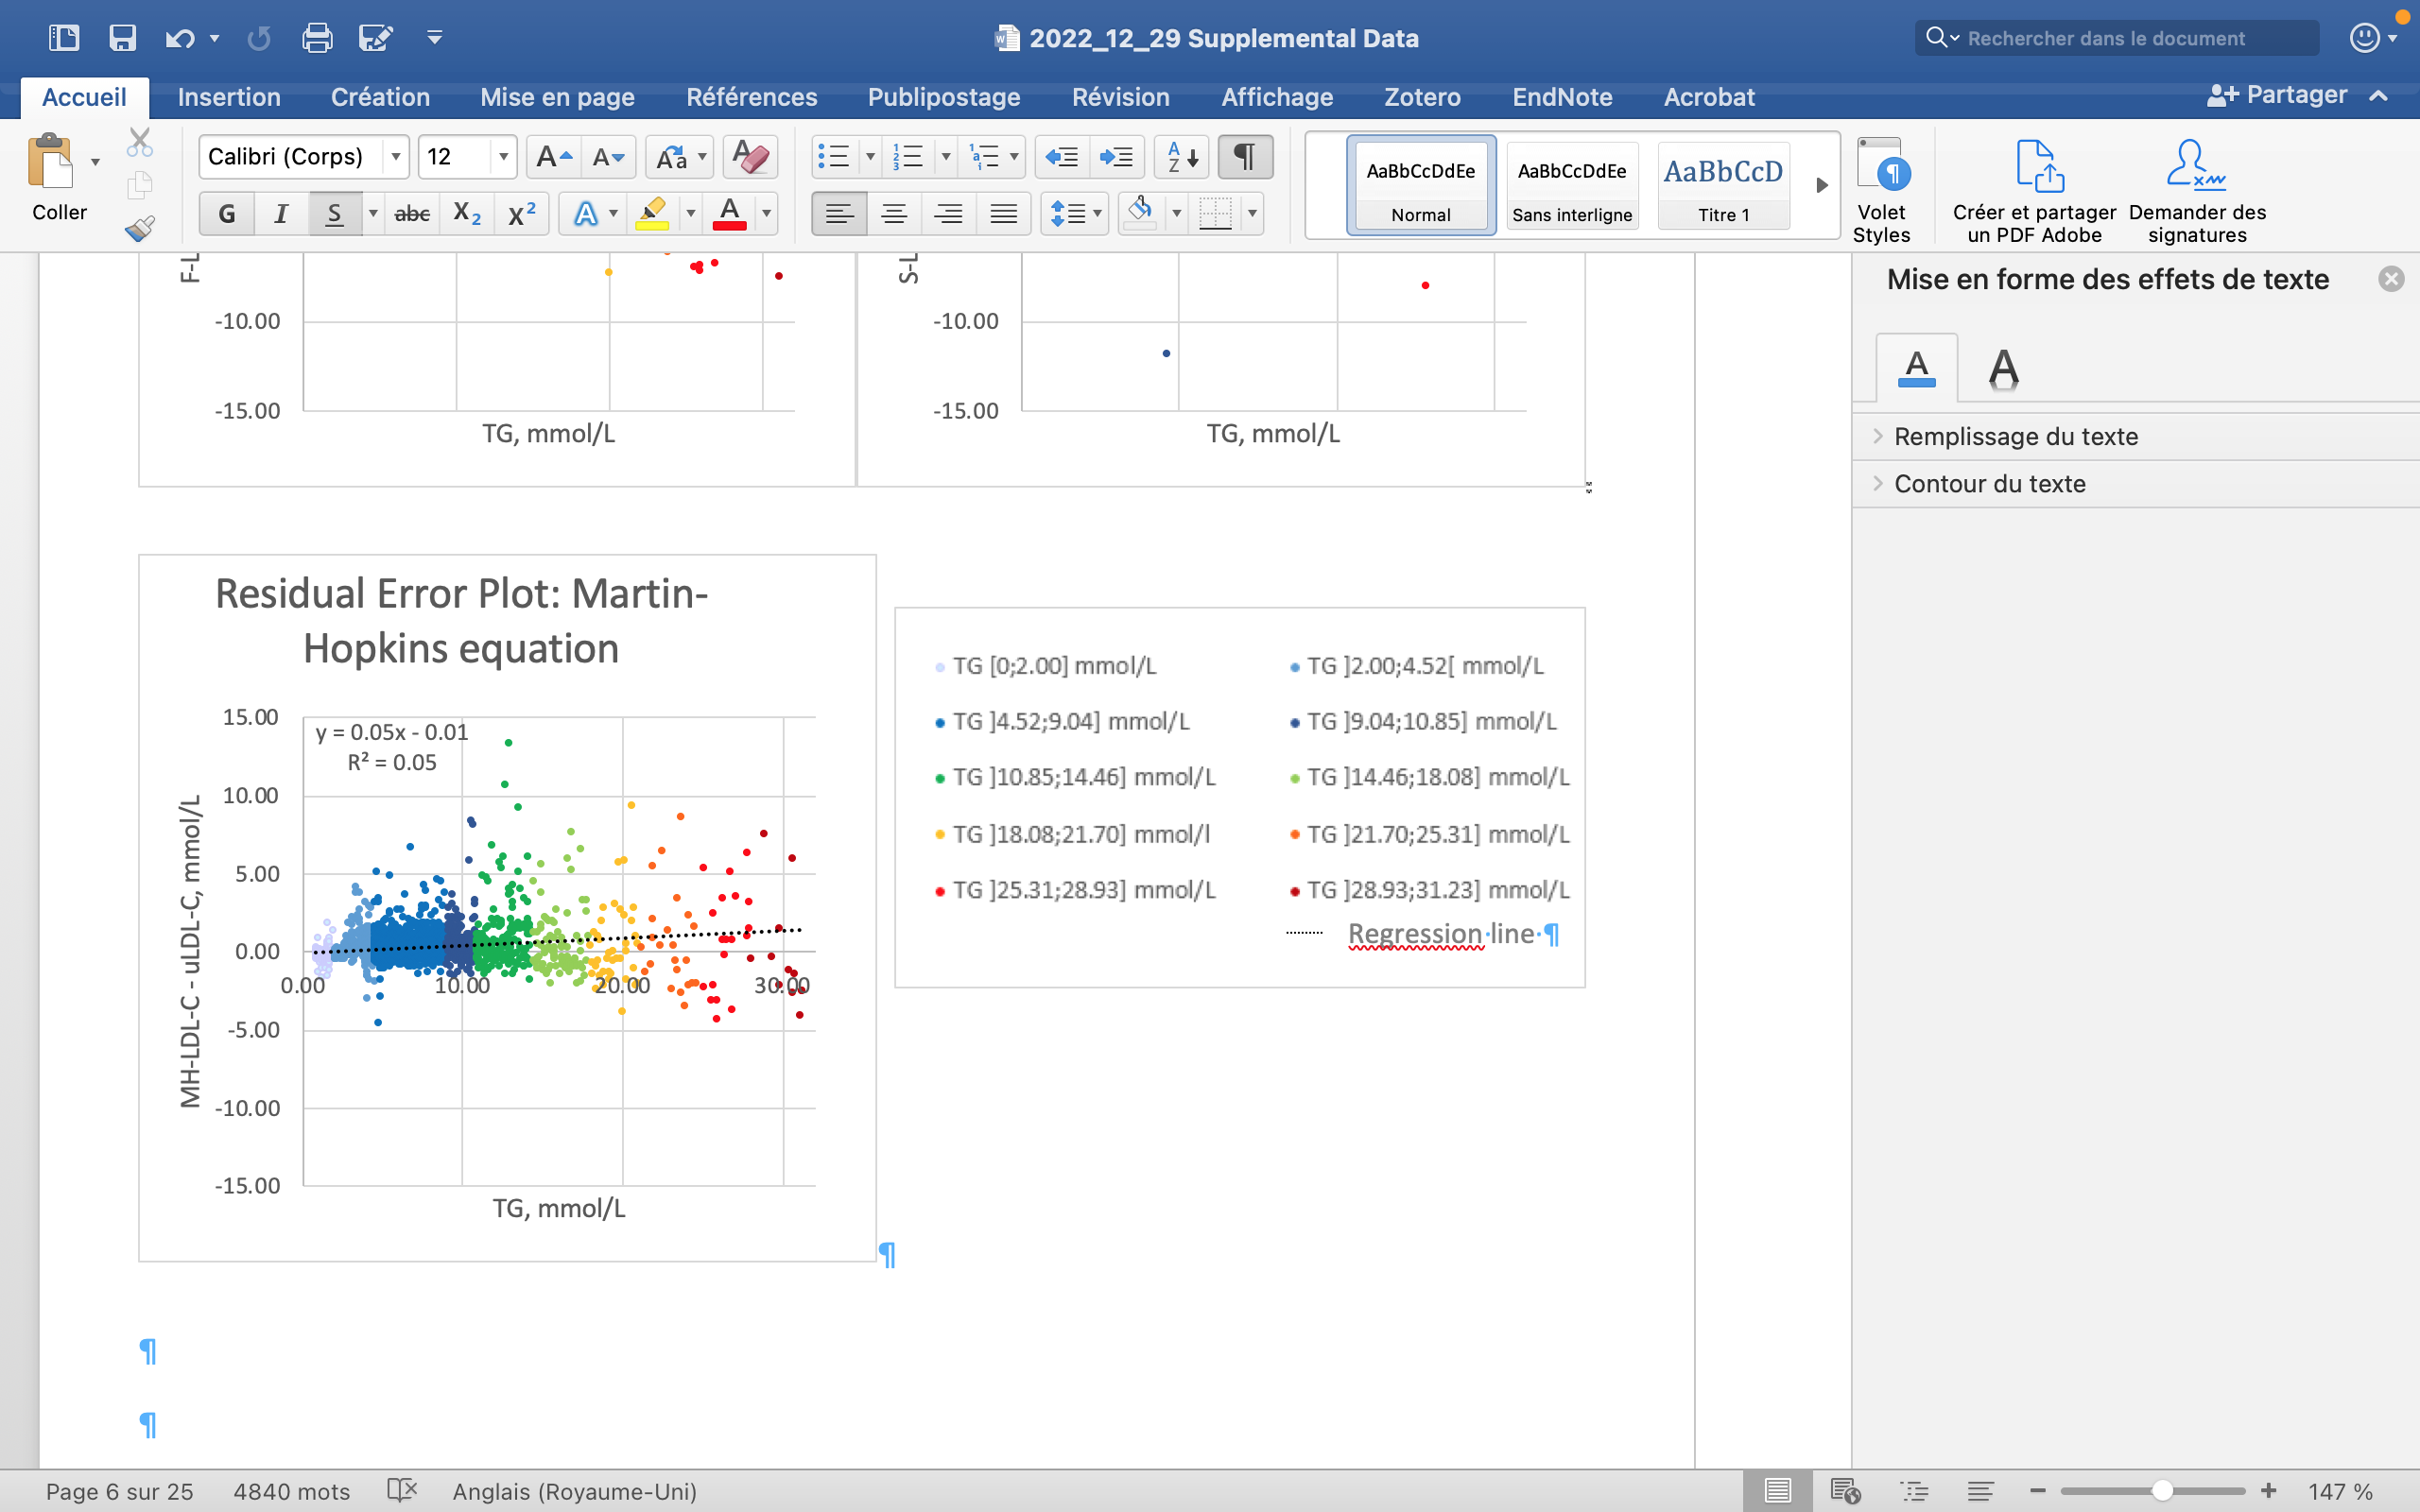

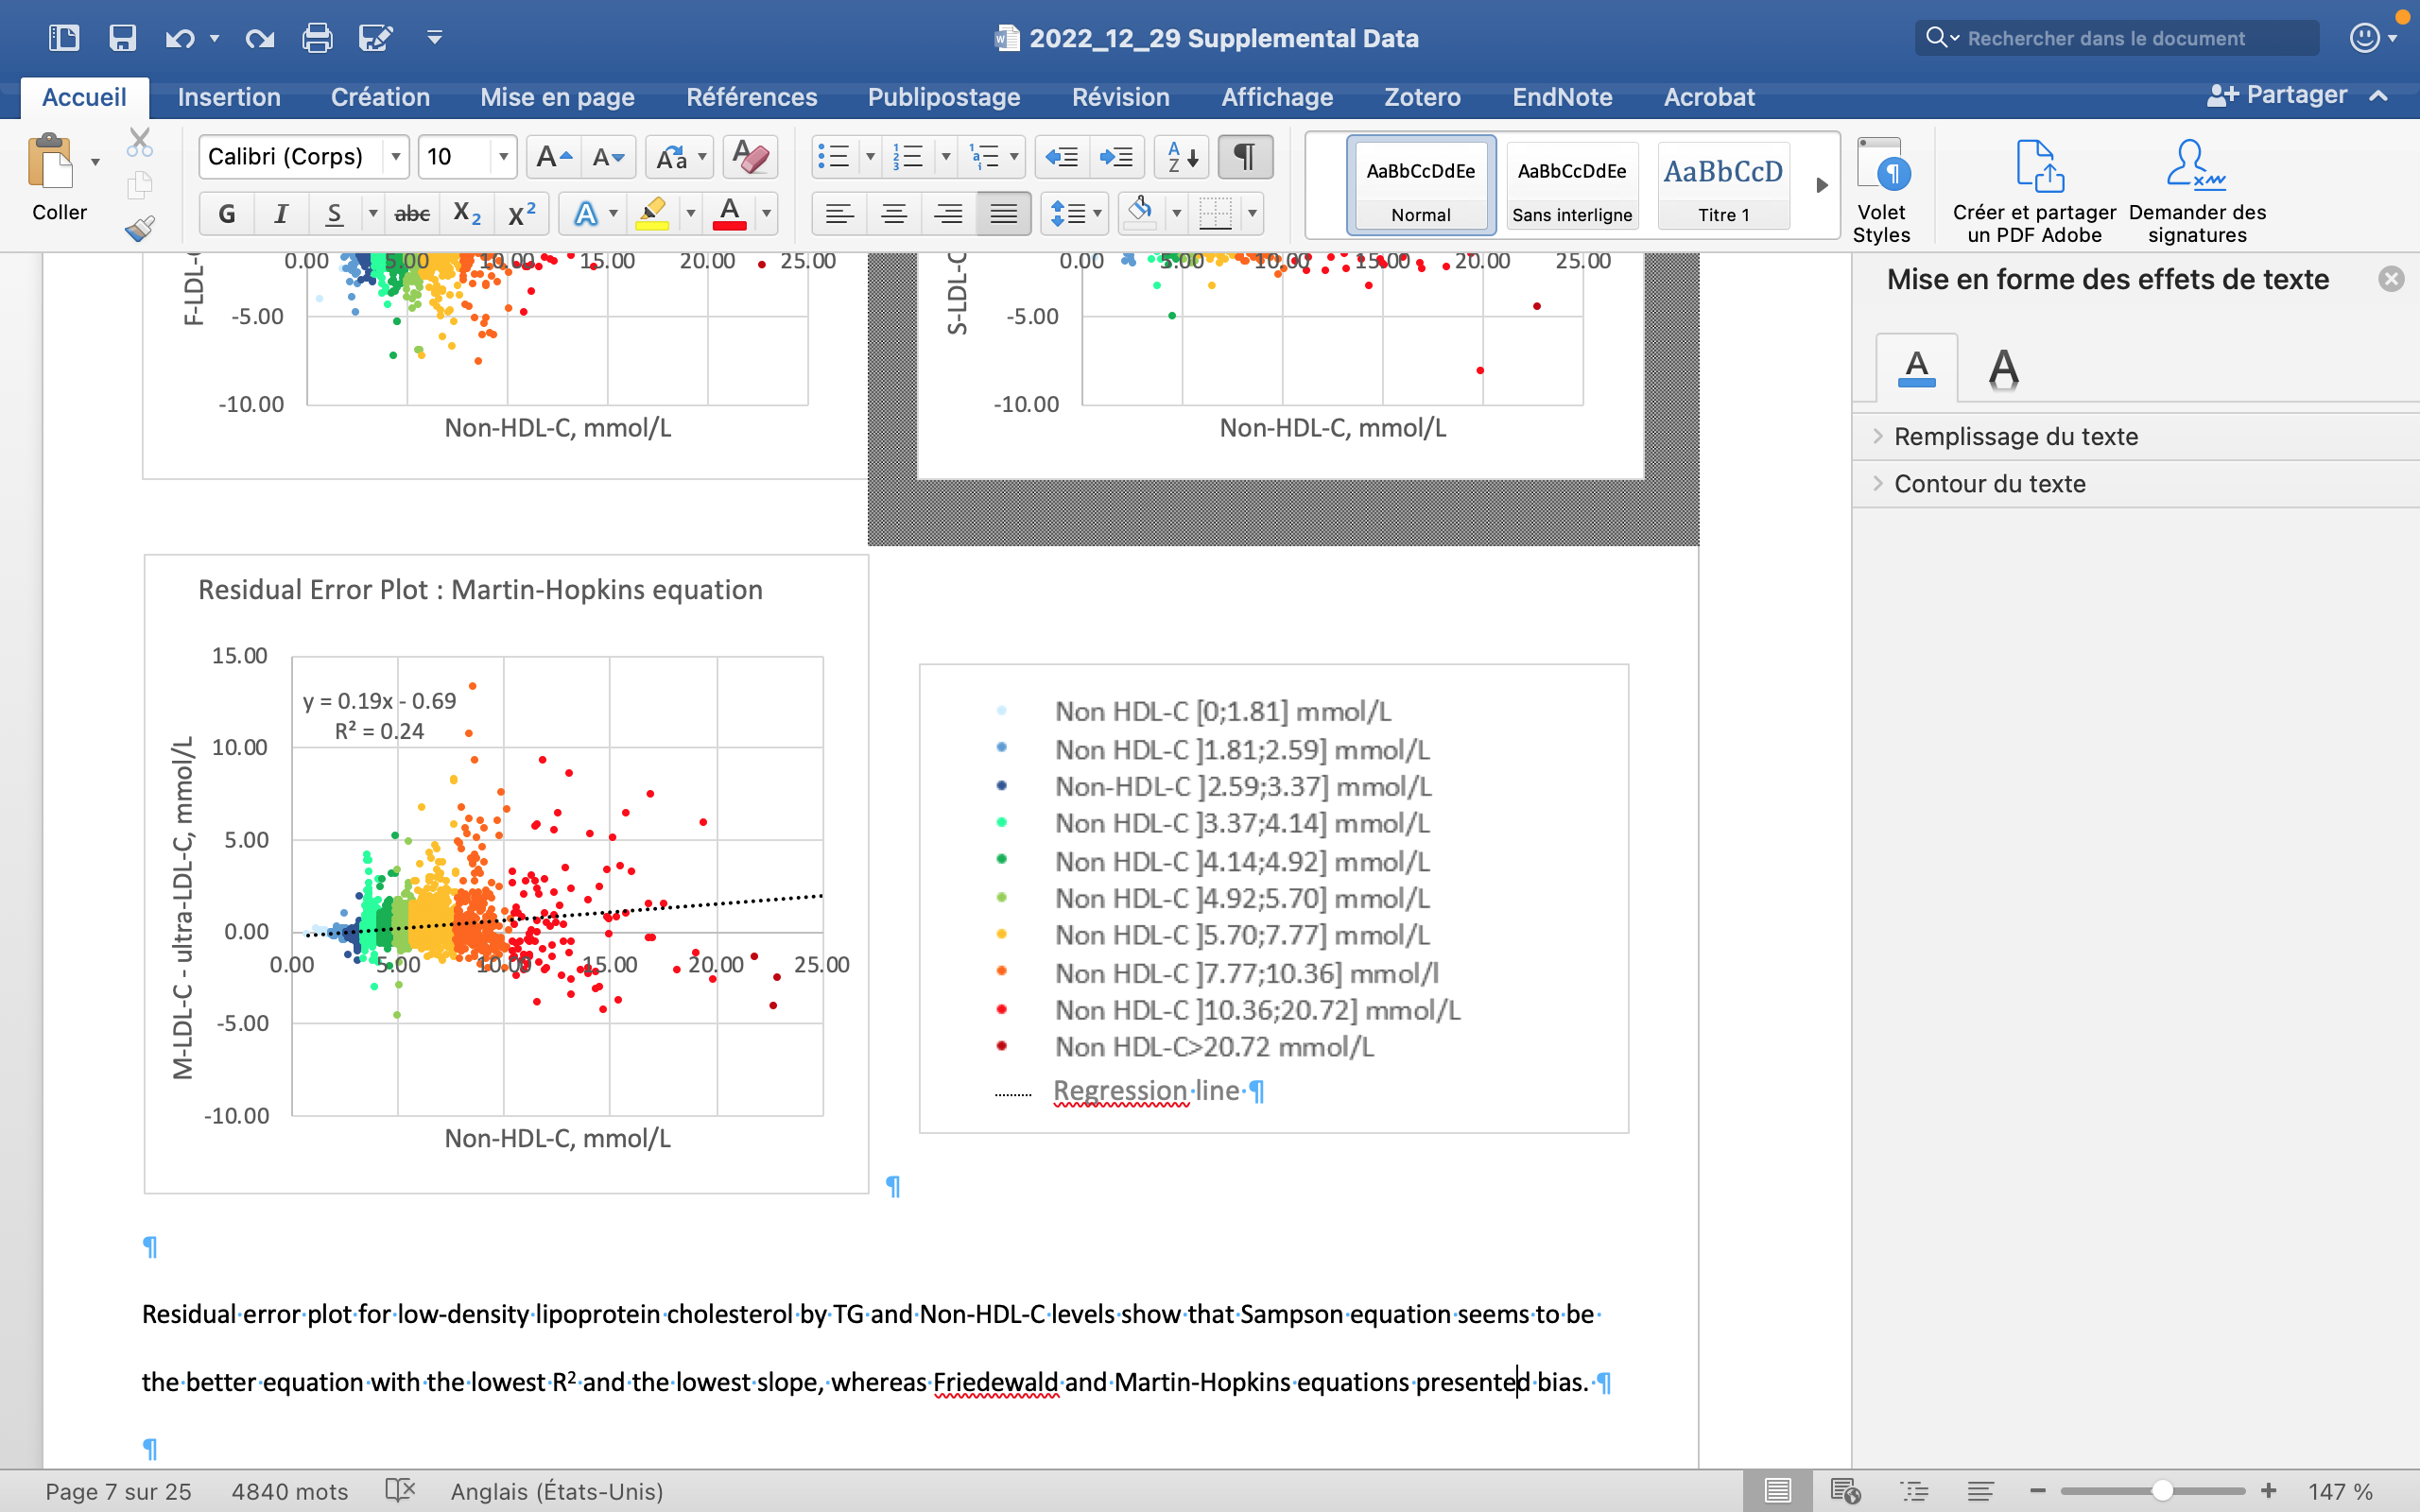


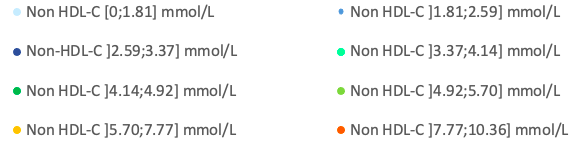


Regression line

Supplemental Figure 11. MAD score for TG intervals in postprandial state (n=1107)

| *MAD score for TG intervals* | |  |  | | |
| --- | --- | --- | --- | --- | --- |
| TG (mmol/L) | [0 - 2.00[ | | | [2.00 - 4.52[ | [4.52 - 9.04[ |
| **N** | 253 | | | 428 | 426 |
| **u--LDL-C** | 1.37 | | | 1.20 | 1.10 |
| **F-LDL-C** | 1.28 | | | 1.37 | 1.29 |
| **S-LDL-C** | 1.28 | | | 1.23 | 1.03 |
| **MH-LDL-C** | 1.25 | | | 1.21 | 1.06 |

S-LDL-C

F-LDL-C

uLDL

MH-LDL-C

F-LDL-C

uLDL-C

MH-LDL-C

S-LDL-C

[0-2.00[ [2.00-4.52[ [4.52-9.04]

Supplement Table 5. Misclassification in non-fasting population (n=1180)

To verify the accuracy of Sampson equation up to TG values of 9.04 mmol/L (i.e. 800 mg/dL). we performed the misclassification rate for the categorization of patients into different LDL-C treatment groups.

5A. Misclassification table for TG < 4.52 mmol/L (n=681)

|  |  | LDL-C measured by ultracentrifugation | | | | | | |
| --- | --- | --- | --- | --- | --- | --- | --- | --- |
|  | Categories of LDL-C rate (mmol/L) | 1 : <1.4 | 2 : 1.4-<1.8 | 3 : 1.8-<2.6 | 4 : 2.6-<3.0 | 5 : 3.0-<4.9 | 6 : ≥4.9 | Total patients |
| F-LDL-C | 1 : <1.4 | 48 | 48 | 41 |  |  |  | 137 |
| 2 : 1.4-<1.8 |  | 4 | 38 | 9 | 2 |  | 53 |
| 3 : 1.8-<2.6 |  | 1 | 138 | 41 | 30 |  | 210 |
| 4 : 2.6-<3.0 |  |  | 1 | 3 | 41 |  | 45 |
| 5 : 3.0-<4.9 | 4 |  | 1 | 4 | 115 | 16 | 140 |
| 6 : ≥4.9 | 1 |  |  |  | 1 | 94 | 96 |
|  | Total patients | 53 | 53 | 219 | 57 | 189 | 110 | 681 |
|  |  | | | | | | | |
|  | Same classification | 90.57% | 7.55% | 63.01% | 5.26% | 60.85% | 85.45% | 59.03% |
|  | Total misclassification | 9.43% | 92.45% | 36.99% | 94.74% | 39.15% | 14.55% | 40.97% |
|  | Lower misclassified by Friedewald | 0.00% | 90.57% | 36.07% | 87.72% | 38.62% | 14.55% | 39.06% |
|  | Upper misclassified by Friedewald | 9.43% | 1.89% | 0.91% | 7.02% | 0.53% | 0.00% | 1.91% |
|  | 95% confidence interval of Kappa = [0.44 ;0.53] | | | | | | | |

|  |  | LDL-C measured by ultracentrifugation | | | | | | |  |
| --- | --- | --- | --- | --- | --- | --- | --- | --- | --- |
|  | Categories of LDL-C rate (mmol/L) | 1 : <1.4 | 2 : 1.4-<1.8 | 3 : 1.8-<2.6 | 4 : 2.6-<3.0 | 5 : 3.0-<4.9 | 6 : >=4.9 | Total patients |
| MH-LDL-C | 1 : <1.4 | 45 | 18 | 1 |  |  |  | 64 |
| 2 : 1.4-<1.8 | 3 | 30 | 25 |  |  |  | 58 |
| 3 : 1.8-<2.6 |  | 5 | 176 | 26 | 2 |  | 209 |
| 4 : 2.6-<3.0 |  |  | 16 | 22 | 26 |  | 64 |
| 5 : 3.0-<4.9 | 4 |  | 1 | 9 | 158 | 9 | 181 |
| 6 : >=4.9 | 1 |  |  |  | 3 | 101 | 105 |
|  | Total patients | 53 | 53 | 219 | 57 | 189 | 110 | 681 |
|  |  | | | | | | | |
|  | Same classification | 84.91% | 56.60% | 80.37% | 38.60% | 83.60% | 91.82% | 78.12% |
|  | Total misclassification | 15.09% | 43.40% | 19.63% | 61.40% | 16.40% | 8.18% | 21.88% |
|  | Lower misclassified by Martin-Hopkins | 0.00% | 33.96% | 11.87% | 45.61% | 14.81% | 8.18% | 15.71% |
|  | Upper misclassified by Martin-Hopkins | 15.09% | 9.43% | 7.76% | 15.79% | 1.59% | 0.00% | 6.17% |
|  | 95% confidence interval of Kappa = [0.68 ;0.76] | | | | | | | |

|  |  | LDL-C measured by ultracentrifugation | | | | | | |
| --- | --- | --- | --- | --- | --- | --- | --- | --- |
|  | Categories of LDL-C rate (mmol/L) | 1 : <1.4 | 2 : 1.4-<1.8 | 3 : 1.8-<2.6 | 4 : 2.6-<3.0 | 5 : 3.0-<4.9 | 6 : ≥4.9 | Total patients |
| S-LDL-C | 1 : <1.4 | 48 | 41 | 8 |  |  |  | 97 |
| 2 : 1.4-<1.8 |  | 9 | 43 |  |  |  | 52 |
| 3 : 1.8-<2.6 |  | 3 | 163 | 40 | 11 |  | 217 |
| 4 : 2.6-<3.0 |  |  | 4 | 12 | 37 |  | 53 |
| 5 : 3.0-<4.9 | 4 |  | 1 | 5 | 140 | 16 | 166 |
| 6 : ≥4.9 | 1 |  |  |  | 1 | 94 | 96 |
|  | Total patients | 53 | 53 | 219 | 57 | 189 | 110 | 681 |
|  |  | | | | | | | |
|  | Same classification | 90.57% | 16.98% | 74.43% | 21.05% | 74.07% | 85.45% | 68.43% |
|  | Total misclassification | 9.43% | 83.02% | 25.57% | 78.95% | 25.93% | 14.55% | 31.57% |
|  | Lower misclassified by Sampson | 0.00% | 77.36% | 23.29% | 70.18% | 25.40% | 14.55% | 28.78% |
|  | Upper misclassified by Sampson | 9.43% | 5.66% | 2.28% | 8.77% | 0.53% | 0.00% | 2.79% |
|  | 95% confidence interval of Kappa = [0.55 ;0.64] | | | | | | | |

5B. Misclassification table for TG ≤ 9.04 mmol/L (n=1107)

|  |  | LDL-C measured by ultracentrifugation | | | | | | |
| --- | --- | --- | --- | --- | --- | --- | --- | --- |
|  | Categories of LDL-C rate (mmol/L) | 1 : <1.4 | 2 : 1.4-<1.8 | 3 : 1.8-<2.6 | 4 : 2.6-<3.0 | 5 : 3.0-<4.9 | 6 : ≥4.9 | Total patients |
| F-LDL-C | 1 : <1.4 | 65 | 65 | 94 | 16 | 6 |  | 246 |
| 2 : 1.4-<1.8 |  | 5 | 64 | 27 | 11 |  | 107 |
| 3 : 1.8-<2.6 |  | 1 | 148 | 65 | 92 |  | 306 |
| 4 : 2.6-<3.0 |  |  | 6 | 6 | 77 |  | 93 |
| 5 : 3.0-<4.9 | 4 |  | 2 | 8 | 177 | 33 | 221 |
| 6 : ≥4.9 | 1 |  |  | 1 | 4 | 129 | 134 |
|  | Total patients | 70 | 71 | 314 | 123 | 367 | 162 | 1107 |
|  |  | | | | | | | |
|  | Same classification | 92.86% | 7.04% | 47.13% | 4.88% | 48.23% | 79.63% | 47.88% |
|  | Total misclassification | 7.14% | 92.96% | 52.87% | 95.12% | 51.77% | 20.37% | 52.12% |
|  | Lower misclassified by Friedewald | 0.00% | 91.55% | 50.32% | 87.80% | 50.68% | 20.37% | 49.68% |
|  | Upper misclassified by Friedewald | 7.14% | 1.41% | 2.55% | 7.32% | 1.09% | 0.00% | 2.44% |
|  | 95% confidence interval of Kappa = [0.32 ;0.39] | | | | | | | |

|  |  | LDL-C measured by ultracentrifugation | | | | | | |  |
| --- | --- | --- | --- | --- | --- | --- | --- | --- | --- |
|  | Categories of LDL-C rate (mmol/L) | 1 : <1.4 | 2 : 1.4-<1.8 | 3 : 1.8-<2.6 | 4 : 2.6-<3.0 | 5 : 3.0-<4.9 | 6 : >=4.9 | Total patients |
| MH-LDL-C | 1 : <1.4 | 51 | 19 | 2 |  |  |  | 72 |
| 2 : 1.4-<1.8 | 9 | 35 | 34 | 1 |  |  | 79 |
| 3 : 1.8-<2.6 | 5 | 17 | 236 | 51 | 10 |  | 319 |
| 4 : 2.6-<3.0 |  |  | 30 | 48 | 57 |  | 135 |
| 5 : 3.0-<4.9 | 4 |  | 12 | 22 | 293 | 18 | 349 |
| 6 : >=4.9 | 1 |  |  | 1 | 7 | 144 | 153 |
|  | Total patients | 70 | 71 | 314 | 123 | 367 | 162 | 1107 |
|  |  | | | | | | | |
|  | Same classification | 72.86% | 49.30% | 75.16% | 39.02% | 79.84% | 88.89% | 72.90% |
|  | Total misclassification | 27.14% | 50.70% | 24.84% | 60.98% | 20.16% | 11.11% | 27.10% |
|  | Lower misclassified by Martin-Hopkins | 0.00% | 26.76% | 11.46% | 42.28% | 18.26% | 11.11% | 17.34% |
|  | Upper misclassified by Martin-Hopkins | 27.14% | 23.94% | 13.38% | 18.70% | 1.91% | 0.00% | 9.76% |
|  | 95% confidence interval of Kappa = [0.62 ;0.68] | | | | | | | |

|  |  | LDL-C measured by ultracentrifugation | | | | | | |
| --- | --- | --- | --- | --- | --- | --- | --- | --- |
|  | Categories of LDL-C rate (mmol/L) | 1 : <1.4 | 2 : 1.4-<1.8 | 3 : 1.8-<2.6 | 4 : 2.6-<3.0 | 5 : 3.0-<4.9 | 6 : ≥4.9 | Total patients |
| S-LDL-C | 1 : <1.4 | 63 | 52 | 24 | 2 |  |  | 141 |
| 2 : 1.4-<1.8 | 2 | 15 | 69 | 10 | 2 |  | 98 |
| 3 : 1.8-<2.6 |  | 4 | 206 | 83 | 56 |  | 349 |
| 4 : 2.6-<3.0 |  |  | 9 | 15 | 79 |  | 103 |
| 5 : 3.0-<4.9 | 4 |  | 6 | 12 | 226 | 35 | 283 |
| 6 : ≥4.9 | 1 |  |  | 1 | 4 | 127 | 133 |
|  | Total patients | 70 | 71 | 314 | 123 | 367 | 162 | 1107 |
|  |  | | | | | | | |
|  | Same classification | 90.00% | 21.13% | 65.61% | 12.20% | 61.58% | 78.40% | 58.90% |
|  | Total misclassification | 10.00% | 78.87% | 34.39% | 87.80% | 38.42% | 21.60% | 41.10% |
|  | Lower misclassified by Sampson | 0.00% | 73.24% | 29.62% | 77.24% | 37.33% | 21.60% | 37.22% |
|  | Upper misclassified by Sampson | 10.00% | 5.63% | 4.78% | 10.57% | 1.09% | 0.00% | 3.88% |
|  | 95% confidence interval of Kappa = [0.44 ;0.51] | | | | | | | |

5C. Misclassification table for 4.52 ≤ TG < 9.04 mmol/L (n=424)

|  |  | LDL-C measured by ultracentrifugation | | | | | | |
| --- | --- | --- | --- | --- | --- | --- | --- | --- |
|  | Categories of LDL-C rate (mmol/L) | 1 : <1.4 | 2 : 1.4-<1.8 | 3 : 1.8-<2.6 | 4 : 2.6-<3.0 | 5 : 3.0-<4.9 | 6 : ≥4.9 | Total patients |
| F-LDL-C | 1 : <1.4 | 16 | 17 | 53 | 16 | 6 |  | 108 |
| 2 : 1.4-<1.8 |  | 1 | 26 | 18 | 9 |  | 54 |
| 3 : 1.8-<2.6 |  |  | 10 | 24 | 61 |  | 95 |
| 4 : 2.6-<3.0 |  |  | 5 | 3 | 36 |  | 44 |
| 5 : 3.0-<4.9 |  |  | 1 | 4 | 62 | 17 | 84 |
| 6 : ≥4.9 |  |  |  | 1 | 3 | 35 | 39 |
|  | Total patients | 16 | 18 | 95 | 66 | 177 | 52 | 424 |
|  |  | | | | | | | |
|  | Same classification | 100.00% | 5.56% | 10.53% | 4.55% | 35.03% | 67.31% | 29.95% |
|  | Total misclassification | 0.00% | 94.44% | 89.47% | 95.45% | 64.97% | 32.69% | 70.05% |
|  | Lower misclassified by Friedewald | 0.00% | 94.44% | 83.16% | 87.88% | 63.28% | 32.69% | 66.75% |
|  | Upper misclassified by Friedewald | 0.00% | 0.00% | 6.32% | 7.58% | 1.69% | 0.00% | 3.30% |
|  | 95% confidence interval of Kappa = [0.10 ;0.20] | | | | | | | |

|  |  | LDL-C measured by ultracentrifugation | | | | | | |  |
| --- | --- | --- | --- | --- | --- | --- | --- | --- | --- |
|  | Categories of LDL-C rate (mmol/L) | 1 : <1.4 | 2 : 1.4-<1.8 | 3 : 1.8-<2.6 | 4 : 2.6-<3.0 | 5 : 3.0-<4.9 | 6 : >=4.9 | Total patients |
| MH-LDL-C | 1 : <1.4 | 5 | 1 | 1 |  |  |  | 7 |
| 2 : 1.4-<1.8 | 6 | 5 | 9 | 1 |  |  | 21 |
| 3 : 1.8-<2.6 | 5 | 12 | 60 | 25 | 8 |  | 110 |
| 4 : 2.6-<3.0 |  |  | 14 | 26 | 30 |  | 70 |
| 5 : 3.0-<4.9 |  |  | 11 | 13 | 135 | 9 | 168 |
| 6 : >=4.9 |  |  |  | 1 | 4 | 43 | 48 |
|  | Total patients | 16 | 18 | 95 | 66 | 177 | 52 | 424 |
|  |  | | | | | | | |
|  | Same classification | 31.25% | 27.78% | 63.16% | 39.39% | 76.27% | 82.69% | 64.62% |
|  | Total misclassification | 68.75% | 72.22% | 36.84% | 60.61% | 23.73% | 17.31% | 35.38% |
|  | Lower misclassified by Martin-Hopkins | 0.00% | 5.56% | 10.53% | 39.39% | 21.47% | 17.31% | 19.81% |
|  | Upper misclassified by Martin-Hopkins | 68.75% | 66.67% | 26.32% | 21.21% | 2.26% | 0.00% | 15.57% |
|  | 95% confidence interval of Kappa = [0.46 ;0.58] | | | | | | | |
|  |  | LDL-C measured by ultracentrifugation | | | | | | |
|  | Categories of LDL-C rate (mmol/L) | 1 : <1.4 | 2 : 1.4-<1.8 | 3 : 1.8-<2.6 | 4 : 2.6-<3.0 | 5 : 3.0-<4.9 | 6 : ≥4.9 | Total patients |
| S-LDL-C | 1 : <1.4 | 14 | 11 | 16 | 2 |  |  | 43 |
| 2 : 1.4-<1.8 | 2 | 6 | 26 | 10 | 2 |  | 46 |
| 3 : 1.8-<2.6 |  | 1 | 43 | 43 | 44 |  | 131 |
| 4 : 2.6-<3.0 |  |  | 5 | 3 | 42 |  | 50 |
| 5 : 3.0-<4.9 |  |  | 5 | 7 | 86 | 19 | 117 |
| 6 : ≥4.9 |  |  |  | 1 | 3 | 33 | 37 |
|  | Total patients | 16 | 18 | 95 | 66 | 177 | 52 | 424 |
|  |  | | | | | | | |
|  | Same classification | 87.50% | 33.33% | 45.26% | 4.55% | 48.59% | 63.46% | 43.63% |
|  | Total misclassification | 12.50% | 66.67% | 54.74% | 95.45% | 51.41% | 36.54% | 56.37% |
|  | Lower misclassified by Sampson | 0.00% | 61.11% | 44.21% | 83.33% | 49.72% | 36.54% | 50.71% |
|  | Upper misclassified by Sampson | 12.50% | 5.56% | 10.53% | 12.12% | 1.69% | 0.00% | 5.66% |
|  | 95% confidence interval of Kappa = [0.22 ;0.33] | | | | | | | |

5D. Misclassification in the overall non-fasting population (n=1180)

|  |  | | LDL-C measured by ultracentrifugation | | | | | | | | | | | | | |
| --- | --- | --- | --- | --- | --- | --- | --- | --- | --- | --- | --- | --- | --- | --- | --- | --- |
|  | Categories of LDL-C rate (mmol/L) | | 1 : <1.4 | | 2 : 1.4-<1.8 | | 3 : 1.8-<2.6 | | 4 : 2.6-<3.0 | | 5 : 3.0-<4.9 | | 6 : ≥4.9 | | Total patients | |
| F-LDL-C | 1 : <1.4 | | 83 | | 70 | | 109 | | 19 | | 15 | |  | | 296 | |
| 2 : 1.4-<1.8 | |  | | 5 | | 65 | | 28 | | 11 | |  | | 109 | |
| 3 : 1.8-<2.6 | |  | | 1 | | 150 | | 66 | | 96 | |  | | 313 | |
| 4 : 2.6-<3.0 | |  | |  | | 6 | | 6 | | 79 | |  | | 91 | |
| 5 : 3.0-<4.9 | | 4 | | 1 | | 4 | | 8 | | 180 | | 131 | | 328 | |
| 6 : ≥4.9 | | 2 | |  | |  | | 1 | | 6 | | 34 | | 43 | |
|  | Total patients | | 89 | | 77 | | 334 | | 128 | | 387 | | 165 | | 1180 | |
|  |  | | | | | | | | | | | | | | | |
|  | Same classification | | 93.26% | | 6.49% | | 44.91% | | 4.69% | | 46.51% | | 20.61% | | 38.81% | |
|  | Total  misclassification | | 6.74% | | 93.51% | | 55.09% | | 95.31% | | 53.49% | | 79.39% | | **61.19%** | |
|  | Lower misclassified by Friedewald | | 0.00% | | 90.91% | | 52.10% | | 88.28% | | 51.94% | | 79.39% | | **58.39%** | |
|  | Upper misclassified by Friedewald | | 6.74% | | 2.60% | | 2.99% | | 7.03% | | 1.55% | | 0.00% | | 2.80% | |
|  | 95% confidence interval of Kappa = [0.20 ;0.26] | | | | | | | | | | | | | | | |
|  |  | | |  | | | | | | | | | | | | |
|  | |  | | LDL-C measured by ultracentrifugation | | | | | | | | | | | | | |  |
|  | | Categories of LDL-C rate (mmol/L) | | 1 : <1.4 | | 2 : 1.4-<1.8 | | 3 : 1.8-<2.6 | | 4 : 2.6-<3.0 | | 5 : 3.0-<4.9 | | 6 : >=4.9 | | Total patients | |
| MH-LDL-C | | 1 : <1.4 | | 67 | | 21 | | 7 | |  | | 1 | |  | | 96 | |
| 2 : 1.4-<1.8 | | 9 | | 37 | | 37 | | 1 | | 2 | |  | | 86 | |
| 3 : 1.8-<2.6 | | 6 | | 18 | | 242 | | 53 | | 12 | |  | | 331 | |
| 4 : 2.6-<3.0 | |  | |  | | 31 | | 50 | | 59 | |  | | 140 | |
| 5 : 3.0-<4.9 | | 5 | |  | | 17 | | 23 | | 304 | | 18 | | 367 | |
| 6 : >=4.9 | | 2 | | 1 | |  | | 1 | | 9 | | 147 | | 160 | |
|  | | Total patients | | 89 | | 77 | | 334 | | 128 | | 387 | | 165 | | 1180 | |
|  | |  | | | | | | | | | | | | | | | |
|  | | Same classification | | 75.28% | | 48.05% | | 72.46% | | 39.06% | | 78.55% | | 89.09% | | 71.78% | |
|  | | Total misclassification | | 24.72% | | 51.95% | | 27.54% | | 60.94% | | 21.45% | | 10.91% | | **28.22%** | |
|  | | Lower misclassified by Martin-Hopkins | | 0.00% | | 27.27% | | 13.17% | | 42.19% | | 19.12% | | 10.91% | | **17.88%** | |
|  | | Upper misclassified by Martin-Hopkins | | 24.72% | | 24.68% | | 14.37% | | 18.75% | | 2.33% | | 0.00% | | 10.34% | |
|  | | 95% confidence interval of Kappa = [0.60 ;0.67 ] | | | | | | | | | | | | | | | |

|  |  | LDL-C measured by ultracentrifugation | | | | | | |
| --- | --- | --- | --- | --- | --- | --- | --- | --- |
|  | Categories of LDL-C rate (mmol/L) | 1 : <1.4 | 2 : 1.4-<1.8 | 3 : 1.8-<2.6 | 4 : 2.6-<3.0 | 5 : 3.0-<4.9 | 6 : ≥4.9 | Total patients |
| S-LDL-C | 1 : <1.4 | 79 | 54 | 34 | 2 | 1 |  | 170 |
| 2 : 1.4-<1.8 | 4 | 18 | 73 | 12 | 7 |  | 114 |
| 3 : 1.8-<2.6 |  | 4 | 209 | 86 | 61 |  | 360 |
| 4 : 2.6-<3.0 |  |  | 11 | 15 | 82 |  | 108 |
| 5 : 3.0-<4.9 | 5 | 1 | 7 | 12 | 230 | 36 | 291 |
| 6 : ≥4.9 | 1 |  |  | 1 | 6 | 129 | 137 |
|  | Total patients | 89 | 77 | 334 | 128 | 387 | 165 | 1180 |
|  |  | | | | | | | |
|  | Same classification | 88.76% | 23.38% | 62.57% | 11.72% | 59.43% | 78.18% | 57.63% |
|  | Total misclassification | 11.24% | 76.62% | 37.43% | 88.28% | 40.57% | 21.82% | **42.37%** |
|  | Lower misclassified by Sampson | 0.00% | 70.13% | 32.04% | 78.13% | 39.02% | 21.82% | **37.97%** |
|  | Upper misclassified by Sampson | 11.24% | 6.49% | 5.39% | 10.16% | 1.55% | 0.00% | 4.41% |
|  | 95% confidence interval of Kappa = [0.43 ;0.50] | | | | | | | |

Supplemental Table 6. Classification table for cLDL-c<1.80mmol/L and TG<4.52 mmol/L on non-fasting population

|  | F-LDL-C | | | |  |
| --- | --- | --- | --- | --- | --- |
|  | Categories of LDL-C rate (mmol/L) | 1 : ≤1.41 | 2 : ]1.41-1.80] | Total patients |
| U-LDL-C | 1 : ≤1.41 | 48 |  | 48 |
| 2 : ]1.41-1.80] | 48 | 4 | 52 |
| 3 : ]1.80-2.57] | 41 | 38 | 79 |
| 4 : ]2.56-3.34] |  | 9 | 9 |
| 5 : ]3.34-4.90] |  | 2 | 2 |
| 6 : >4.90 |  |  | 0 |
|  | Total patients | 137 | 53 | 190 |
|  |  | | | |
|  | Same classification | 35.04% | 7.55% | 27.37% |
|  | Total misclassification | 64.96% | 92.45% | 72.63% |
|  | Lower misclassified by ultracentrifugation | 0.00% | 0.00% | 0.00% |
|  | Upper misclassified by ultracentrifugation | 64.96% | 71.70% | **72.63%** |

|  | S-LDL-C | | | |  |
| --- | --- | --- | --- | --- | --- |
|  | Categories of LDL-C rate (mmol/L) | 1 : ≤1.41 | 2 : ]1.41-1.80] | Total patients |
| U-LDL-C | 1 : ≤1.41 | 48 |  | 48 |
| 2 : ]1.41-1.80] | 41 | 9 | 50 |
| 3 : ]1.80-2.57] | 8 | 43 | 51 |
| 4 : ]2.56-3.34] |  |  | 0 |
| 5 : ]3.34-4.90] |  |  | 0 |
| 6 : >4.90 |  |  | 0 |
| Total patients | 97 | 52 | 149 |
|  |  | | | |
|  | Same classification | 49.48% | 17.31% | 38.26% |
|  | Total misclassification | 50.52% | 82.69% | 61.74% |
|  | Lower misclassified by ultracentrifugation | 0.00% | 0.00% | 0.00% |
|  | Upper misclassified by ultracentrifugation | 50.52% | 82.69% | **61.74%** |

|  | MH-LDL-C | | | |  |
| --- | --- | --- | --- | --- | --- |
|  | Categories of LDL-C rate (mmol/L) | 1 : ≤1.41 | 2 : ]1.41-1.80] | Total patients |
| U-LDL-C | 1 : ≤1.41 | 45 | 3 | 48 |
| 2 : ]1.41-1.80] | 18 | 30 | 48 |
| 3 : ]1.80-2.57] | 1 | 25 | 26 |
| 4 : ]2.56-3.34] |  |  | 0 |
| 5 : ]3.34-4.90] |  |  | 0 |
| 6 : >4.90 |  |  | 0 |
|  | Total patients | 64 | 58 | 122 |
|  |  | | | |
|  | Same classification | 70.31% | 51.72% | 61.48% |
|  | Total misclassification | 29.69% | 48.28% | 38.52% |
|  | Lower misclassified by ultracentrifugation | 0.00% | 5.17% | 2.46% |
|  | Upper misclassified by ultracentrifugation | 29.69% | 43.10% | **36.07%** |

**References**

1. Martin SS. Blaha MJ. Elshazly MB. Toth PP. Kwiterovich PO. Blumenthal RS. et al. Comparison of a novel method vs the Friedewald equation for estimating low-density lipoprotein cholesterol levels from the standard lipid profile. JAMA 2013;310:2061‑8.

2. Martin SS. Calculating LDL cholesterol in familial combined hyperlipidemia: Out with the old. in with the new? Atherosclerosis. 2018 Oct;277:172–4.

3. Sathiyakumar V. Park J. Golozar A. Lazo M. Quispe R. Guallar E. Fasting Versus Nonfasting and Low-Density Lipoprotein Cholesterol Accuracy. Circulation 2018;Jan 2;137(1):10–9.

4. Song Y. Lee HS. Baik SJ. Jeon S. Han D. Choi SY. et al. Comparison of the effectiveness of Martin’s equation. Friedewald’s equation. and a Novel equation in low-density lipoprotein cholesterol estimation. Sci Rep. 2021 Jun 29;11(1):13545.

5. Rossouw HM. Nagel SE. Pillay TS. Comparability of 11 different equations for estimating LDL cholesterol on different analysers. Clin Chem Lab Med. 2021 Nov 25;59(12):1930–43.

6. Azimi V. Farnsworth CW. Roper SM. Comparison of the Friedewald equation with Martin and Sampson equations for estimating LDL cholesterol in hypertriglyceridemic adults. Clin Biochem. 2022 Oct;108:1–4.

7. Martin SS. Ditmarsch M. Simmons M. Alp N. Turner T. Davidson MH. et al. Comparison of low-density lipoprotein cholesterol equations in patients with dyslipidaemia receiving cholesterol ester transfer protein inhibition. Eur Heart J Cardiovasc Pharmacother. 2023 Feb 2;9(2):148–55.

8. Barakett-Hamadé V. Ghayad JP. Sleilaty G. [Evaluation of equations for calculating LDL-cholesterol in patients with concomitant hypertriglyceridemia and low LDL-cholesterol: is there a preferred equation?]. Ann Biol Clin (Paris). 2023 Mar 15;81(1):35–43.

*9. Steyn N, Muller Rossouw H, Pillay TS, Martins J. Comparability of calculated LDL-C with directly measured LDL-C in selected paediatric and adult cohorts. Clin Chim Acta Int J Clin Chem. 1 déc 2022;537:158‑66.*

*10. Samuel C, Park J, Sajja A, Michos ED, Blumenthal RS, Jones SR, et al. Accuracy of 23 Equations for Estimating LDL Cholesterol in a Clinical Laboratory Database of 5,051,467 Patients. Glob Heart. 2023;18(1):36.*

11. Sajja A. Park J. Sathiyakumar V. Varghese B. Pallazola VA. Marvel FA. et al. Comparison of Methods to Estimate Low-Density Lipoprotein Cholesterol in Patients With High Triglyceride Levels. JAMA Netw. Open 2021;4:e2128817.

12. Ertürk Zararsız G. Bolat S. Cephe A. Kochan N. Yerlitaş Sİ. Doğan HO. et al. Validation of Friedewald. Martin-Hopkins and Sampson low-density lipoprotein cholesterol equations. PloS One. 2022;17(5):e0263860.

13. Ertürk Zararsız G. Bolat S. Cephe A. Kochan N. Yerlitaş SI. Doğan HO. et al. Validation of low-density lipoprotein cholesterol equations in pediatric population. PeerJ. 2023;11:e14544.

*14.**Steyn N, Muller Rossouw H, Martins J, Pillay TS. Performance of equations for calculated LDL-C in hypertriglyceridaemia: Which one correlates best with directly measured LDL-C? Clin Chim Acta Int J Clin Chem. 1 mai 2023;545:117373.*

*15.**Bolat S, Ertürk Zararsız G, Doğan K, Kochan N, Yerlitaş SI, Cephe A, et al. Concordance of LDL-C Estimating Equations with Direct Enzymatic Measurement in Diabetic and Prediabetic Subjects. J Clin Med. 20 mai 2023;12(10):3570.*

16. Sampson M. Ling C. Sun Q. Harb R. Ashmaig M. Warnick R. A New Equation for Calculation of Low-Density Lipoprotein Cholesterol in Patients With Normolipidemia and/or Hypertriglyceridemia. JAMA Cardiol 2020;May 1;5(5):540–8.

17. Piani F. Cicero AFG. Borghi C. D’Addato S. group BLIPS. Is the 2020 Sampson equation the best formula for LDL-C estimation? Eur J Intern Med 2021;83:99‑101.

18. Martínez-Morillo E. García-García M. Concha MAL. Varas LR. Evaluation of a new equation for estimating low-density lipoprotein cholesterol through the comparison with various recommended methods. Biochem Medica 2021;Feb 15;31(1):010701.

19. Cicero AFG. Fogacci F. Patrono D. Mancini R. Ramazzotti E. Borghi C. et al. Application of the Sampson equation to estimate LDL-C in children: Comparison with LDL direct measurement and Friedewald equation in the BLIP study. Nutr. Metab. Cardiovasc. Dis. NMCD 2021;31:1911‑5.

20. Vargas-Vázquez A. Bello-Chavolla OY. Antonio-Villa NE. Mehta R. Cruz-Bautista I. Aguilar-Salinas CA. Comparative assessment of LDL-C and VLDL-C estimation in familial combined hyperlipidemia using Sampson’s. Martin’s and Friedewald’s equations. Lipids Health Dis 2021;May 5;20(1):46.

21. Sampson M. Wolska A. Cole J. Zubirán R. Otvos JD. Meeusen JW. et al. Accuracy and Clinical Impact of Estimating Low-Density Lipoprotein-Cholesterol at High and Low Levels by Different Equations. Biomedicines 2022;10:3156.

22. Sampson M, Wolska A, Meeusen JW, Donato LJ, Jaffe AS, Remaley AT. Identification of Dysbetalipoproteinemia by an Enhanced Sampson-NIH Equation for Very Low-Density Lipoprotein-Cholesterol. Front Genet. 2022;13:935257.

23. Higgins V. Leiter LA. Delaney SR. Beriault DR. Validating the NIH LDL-C equation in a specialized lipid cohort: Does it add up? Clin Biochem. 2022 Jan;99:60–8.

24. Li J. Xin Y. Li J. Meng M. Zhou L. Qiu H. et al. Evaluation of Sampson equation for LDL-C in acute coronary syndrome patients: a Chinese population-based cohort study. Lipids Health Dis. 2022 Apr 19;21(1):39.

*25. Xu J, Du X, Zhang S, Xiang Q, Zhu L, Liu L. The accuracy of four formulas for LDL-C calculation at the fasting and postprandial states. Front Cardiovasc Med. 2022;9:944003.*

26. Shi B. Wang HY. Yin D. Zhu C. Feng L. Wang H. et al. Comparison of Estimated LDL Cholesterol Equations with Direct Measurement in Patients with Angiographically Confirmed Coronary Artery Disease. J Cardiovasc Dev Dis. 2022 Oct 7;9(10):342.

27. Shi B. Wang HY. Liu J. Cai Z. Song C. Jia L. et al. Directly Measured vs. Calculated Low-Density Lipoprotein Cholesterol Does Not Identify Additional Individuals With Coronary Artery Disease and Diabetes at Higher Risk of Adverse Events: Insight From a Large Percutaneous Coronary Intervention Cohort in Asia. Front Cardiovasc Med. 2022;9:932878.

28. Naser A. Isgandarov K. Güvenç TS. Güvenç RÇ. Şahin M. Comparison of Novel Martin/Hopkins and Sampson Equations for Calculation of Low-Density Lipoprotein Cholesterol in Diabetic Patients. Arq Bras Cardiol. 2022 Aug;119(2):225–33.

29. Islam SMT, Muthukumar AR, Jones PM, Hashim I, Cao J. Comparison of Sampson and extended Martin/Hopkins methods of low-density lipoprotein cholesterol calculations with direct measurement in pediatric patients with hypertriglyceridemia. Lab Med. 30 mai 2023;lmad047.

30. Carelse A, Rossouw HM, Steyn N, Martins J, Pillay TS. Calculated LDL-cholesterol: comparability of the extended Martin/Hopkins, Sampson/NIH, Friedewald and four other equations in South African patients. J Clin Pathol. 21 juin 2023;jcp-2023-208916.

31. Ćwiklińska A, Wieczorek E, Gliwińska A, Marcinkowska M, Czaplińska M, Mickiewicz A, et al. Non-HDL-C/TG ratio indicates significant underestimation of calculated low-density lipoprotein cholesterol (LDL-C) better than TG level: a study on the reliability of mathematical formulas used for LDL-C estimation. Clin Chem Lab Med. 27 avr 2021;59(5):857‑67.

32. Briers PJ, Langlois MR. Concordance of apolipoprotein B concentration with the Friedewald, Martin-Hopkins, and Sampson formulas for calculating LDL cholesterol. Biochem Medica. 15 févr 2022;32(1):010704.

33. Sun CJ, McCudden C, Brisson D, Shaw J, Gaudet D, Ooi TC. Comparison of Three Methods for LDLC Calculation for Cardiovascular Disease Risk Categorisation in Three Distinct Patient Populations. Can J Cardiol. mai 2023;39(5):668‑77.

34. Zafrir B, Saliba W, Flugelman MY. Comparison of Novel Equations for Estimating Low-Density Lipoprotein Cholesterol in Patients Undergoing Coronary Angiography. J Atheroscler Thromb. 1 déc 2020;27(12):1359‑73.

35. Dinç Asarcıklı L, Kış M, Güvenç TS, Tosun V, Acar B, Avcı Demir F, et al. Usefulness of novel Martin/Hopkins and Sampson equations over Friedewald equation in cardiology outpatients: A CVSCORE-TR substudy. Int J Clin Pract. juin 2021;75(6):e14090.

36. Sajja A, Li HF, Spinelli KJ, Blumenthal RS, Virani SS, Martin SS, et al. Discordance Between Standard Equations for Determination of LDL Cholesterol in Patients With Atherosclerosis. J Am Coll Cardiol. 15 févr 2022;79(6):530‑41.

37. Bae HJ, Kim SW, Kim IS. Comparison of low-density lipoprotein cholesterol estimation methods in individuals with insulin resistance: A cross-sectional study. Clin Chim Acta Int J Clin Chem. 1 juill 2023;547:117393.

38. Sun CJ, McCudden C, Brisson D, Shaw J, Gaudet D, Ooi TC. Comparison of Three Methods for LDLC Calculation for Cardiovascular Disease Risk Categorisation in Three Distinct Patient Populations. Can J Cardiol. mai 2023;39(5):668‑77.

39. Zhao PJ, Hegele RA. The Impact of Low-Density Lipoprotein Equation Changes on Cholesterol Treatment in Canada. CJC Open. janv 2023;5(1):37‑42.

40 Aarsand AK. Fernandez-Calle P. Webster C. Coskun A. Gonzales-Lao E. Diaz-Garzon J. Jonker N. Simon M. Braga F. Perich C. Boned B. Marques-Garcia F. Carobene A. Aslan B. Sezer E. Bartlett WA. Sandberg S. The EFLM Biological Variation Database. https://biologicalvariation.eu/ [2023/06/15]).
